# Supplementary material
Source: PubMed Central journal article supplement (PMC3057962)
Supplement: NIHMS245935-supplement-2.pdf [file NIHMS245935-supplement-2.pdf]

Supplemental Table 2: Statistical summary of behavioral data for *Viaat-Mecp2<sup>+/y</sup>* mice

| Behavioral Paradigm                                                        | Age (wks)    | Measurement                                         | Statistical Test    | Comparison                                                                             | Statistics | df, residual | p                                                           | Figure |
|----------------------------------------------------------------------------|--------------|-----------------------------------------------------|---------------------|----------------------------------------------------------------------------------------|------------|--------------|-------------------------------------------------------------|--------|
| <i>Viaat-Mecp2<sup>+/y</sup></i>                                           | 12           | percent grooming time (%)                           | One-way ANOVA       | Genotype                                                                               | F = 26.53  | 3, 56        | < 0.001                                                     | 1f     |
|                                                                            |              |                                                     | Tukey's post hoc    | WT vs. Cre<br>WT vs. Flox<br>WT vs. CKO<br>Cre vs. Flox<br>Cre vs. CKO<br>Flox vs. CKO |            |              | > 0.05<br>> 0.05<br>< 0.001<br>> 0.05<br>< 0.001<br>< 0.001 |        |
| <i>Viaat-Mecp2<sup>+/y</sup></i><br>Holeboard                              | 12           | number of holes with 2 or more sequential nosepekes | Kruskal-Wallis      |                                                                                        | H = 20.55  | 3            | < 0.0001                                                    | 1g     |
|                                                                            |              |                                                     | Dunn's post-hoc     | WT vs. Cre<br>WT vs. Flox<br>WT vs. CKO<br>Cre vs. Flox<br>Cre vs. CKO<br>Flox vs. CKO |            |              | > 0.05<br>> 0.05<br>< 0.05<br>> 0.05<br>< 0.001<br>< 0.001  |        |
| <i>Viaat-Mecp2<sup>+/y</sup></i><br>Hot Plate                              | 12           | time to hindlimb response (sec)                     | One-way ANOVA       | Genotype                                                                               | F = 2.376  | 3, 60        | 0.0789                                                      | S4a    |
| <i>Viaat-Mecp2<sup>+/y</sup></i><br>Tail Flick                             | 12           | time to tail flick response (sec)                   | Tukey's post hoc    | no post tests $p > 0.05$                                                               |            |              |                                                             | S4b    |
|                                                                            |              |                                                     | One-way ANOVA       | Genotype                                                                               | F = 1.854  | 3, 60        | 0.1471                                                      |        |
| <i>Viaat-Mecp2<sup>+/y</sup></i><br>Open Field Assay: Exploratory Activity | 12           | total distance traveled (cm)                        | One-way ANOVA       | Genotype                                                                               | F = 1.034  | 3, 52        | 0.3851                                                      | 2f     |
|                                                                            | 19           | total distance traveled (cm)                        | Tukey's post hoc    | no post tests $p > 0.05$                                                               |            |              |                                                             | 2f     |
| <i>Viaat-Mecp2<sup>+/y</sup></i><br>Footslip                               | 5            | # slips per 100 beam breaks                         | One-way ANOVA       | Genotype                                                                               | F = 39.41  | 3, 59        | < 0.0001                                                    | 2a     |
|                                                                            |              |                                                     | Tukey's post hoc    | WT vs. Cre<br>WT vs. Flox<br>WT vs. CKO<br>Cre vs. Flox<br>Cre vs. CKO<br>Flox vs. CKO |            |              | > 0.05<br>> 0.05<br>< 0.001<br>> 0.05<br>< 0.001<br>< 0.001 |        |
| <i>Viaat-Mecp2<sup>+/y</sup></i><br>Wire Hang                              | 9            | latency to fall (sec)                               | One-way ANOVA       | Genotype                                                                               | F = 42.47  | 3, 59        | < 0.0001                                                    | 2d     |
|                                                                            |              |                                                     | Tukey's post hoc    | WT vs. Cre<br>WT vs. Flox<br>WT vs. CKO<br>Cre vs. Flox<br>Cre vs. CKO<br>Flox vs. CKO |            |              | > 0.05<br>> 0.05<br>< 0.001<br>> 0.05<br>< 0.001<br>< 0.001 |        |
| <i>Viaat-Mecp2<sup>+/y</sup></i><br>Accelerating Rotarod                   | 6            | latency to fall (sec)                               | Two-way ANOVA       | Genotype                                                                               | F = 8.761  | 3            | < 0.0001                                                    | S4c    |
|                                                                            |              |                                                     | Repeated measure    | Trial                                                                                  | F = 79.11  | 7            | < 0.0001                                                    |        |
|                                                                            |              |                                                     |                     | Interaction                                                                            | F = 1.428  | 21           | 0.0999                                                      |        |
|                                                                            |              |                                                     |                     | Subjects                                                                               | F = 8.48   | 60           | < 0.0001                                                    |        |
|                                                                            |              |                                                     |                     | Residual                                                                               |            | 420          |                                                             |        |
|                                                                            |              |                                                     | Bonferroni post hoc | WT vs. Cre                                                                             |            |              | > 0.05                                                      |        |
|                                                                            |              |                                                     | Trial 1             | WT vs. Flox                                                                            |            |              | > 0.05                                                      |        |
|                                                                            |              |                                                     |                     | WT vs. CKO                                                                             |            |              | > 0.05                                                      |        |
|                                                                            | Cre vs. Flox |                                                     |                     | > 0.05                                                                                 |            |              |                                                             |        |
|                                                                            | Cre vs. CKO  |                                                     |                     | > 0.05                                                                                 |            |              |                                                             |        |
|                                                                            | Flox vs. CKO |                                                     |                     | > 0.05                                                                                 |            |              |                                                             |        |
| Bonferroni post hoc                                                        | WT vs. Cre   |                                                     |                     | > 0.05                                                                                 |            |              |                                                             |        |
| Trial 2                                                                    | WT vs. Flox  |                                                     |                     | > 0.05                                                                                 |            |              |                                                             |        |
|                                                                            | WT vs. CKO   |                                                     |                     | > 0.05                                                                                 |            |              |                                                             |        |
|                                                                            | Cre vs. Flox |                                                     |                     | > 0.05                                                                                 |            |              |                                                             |        |
|                                                                            | Cre vs. CKO  |                                                     |                     | > 0.05                                                                                 |            |              |                                                             |        |
|                                                                            | Flox vs. CKO |                                                     |                     | > 0.05                                                                                 |            |              |                                                             |        |
| Bonferroni post hoc                                                        | WT vs. Cre   |                                                     |                     | > 0.05                                                                                 |            |              |                                                             |        |
| Trial 3                                                                    | WT vs. Flox  |                                                     |                     | > 0.05                                                                                 |            |              |                                                             |        |
|                                                                            | WT vs. CKO   |                                                     |                     | > 0.05                                                                                 |            |              |                                                             |        |
|                                                                            | Cre vs. Flox |                                                     |                     | > 0.05                                                                                 |            |              |                                                             |        |
|                                                                            | Cre vs. CKO  |                                                     |                     | > 0.05                                                                                 |            |              |                                                             |        |
|                                                                            | Flox vs. CKO |                                                     |                     | > 0.05                                                                                 |            |              |                                                             |        |
| Bonferroni post hoc                                                        | WT vs. Cre   |                                                     |                     | > 0.05                                                                                 |            |              |                                                             |        |
| Trial 4                                                                    | WT vs. Flox  |                                                     |                     | > 0.05                                                                                 |            |              |                                                             |        |
|                                                                            | WT vs. CKO   |                                                     |                     | > 0.05                                                                                 |            |              |                                                             |        |
|                                                                            | Cre vs. Flox |                                                     |                     | > 0.05                                                                                 |            |              |                                                             |        |
|                                                                            | Cre vs. CKO  |                                                     |                     | > 0.05                                                                                 |            |              |                                                             |        |
|                                                                            | Flox vs. CKO |                                                     |                     | > 0.05                                                                                 |            |              |                                                             |        |
| Bonferroni post hoc                                                        | WT vs. Cre   |                                                     |                     | > 0.05                                                                                 |            |              |                                                             |        |
| Trial 5                                                                    | WT vs. Flox  |                                                     |                     | > 0.05                                                                                 |            |              |                                                             |        |
|                                                                            | WT vs. CKO   |                                                     |                     | > 0.05                                                                                 |            |              |                                                             |        |
|                                                                            | Cre vs. Flox |                                                     |                     | > 0.05                                                                                 |            |              |                                                             |        |
|                                                                            | Cre vs. CKO  |                                                     |                     | > 0.05                                                                                 |            |              |                                                             |        |
|                                                                            | Flox vs. CKO |                                                     |                     | > 0.05                                                                                 |            |              |                                                             |        |
| Bonferroni post hoc                                                        | WT vs. Cre   |                                                     |                     | > 0.05                                                                                 |            |              |                                                             |        |
| Trial 6                                                                    | WT vs. Flox  |                                                     |                     | > 0.05                                                                                 |            |              |                                                             |        |
|                                                                            | WT vs. CKO   |                                                     |                     | > 0.05                                                                                 |            |              |                                                             |        |
|                                                                            | Cre vs. Flox |                                                     |                     | > 0.05                                                                                 |            |              |                                                             |        |
|                                                                            | Cre vs. CKO  |                                                     |                     | > 0.05                                                                                 |            |              |                                                             |        |

|    |                       |                                |                                                                                                        |                                                  |                           |                                                                    |    |  |
|----|-----------------------|--------------------------------|--------------------------------------------------------------------------------------------------------|--------------------------------------------------|---------------------------|--------------------------------------------------------------------|----|--|
|    |                       | Bonferroni post hoc Trial 7    | Flox vs. CKO<br>WT vs. Cre<br>WT vs. Flox<br>WT vs. CKO<br>Cre vs. Flox<br>Cre vs. CKO<br>Flox vs. CKO |                                                  |                           | > 0.05<br>> 0.05<br>> 0.05<br>> 0.05<br>> 0.05<br>> 0.05<br>> 0.05 |    |  |
|    |                       | Bonferroni post hoc Trial 8    | WT vs. Cre<br>WT vs. Flox<br>WT vs. CKO<br>Cre vs. Flox<br>Cre vs. CKO<br>Flox vs. CKO                 |                                                  |                           | > 0.05<br>> 0.05<br>> 0.05<br>> 0.05<br>> 0.05<br>> 0.05           |    |  |
|    | latency to fall (sec) | One-way ANOVA Trial 1          | Genotype                                                                                               | F = 1.291                                        | 3, 60                     | 0.2856                                                             |    |  |
|    |                       | Tukey's post hoc               | no post tests p > 0.05                                                                                 |                                                  |                           |                                                                    |    |  |
|    | latency to fall (sec) | One-way ANOVA Trial 2          | Genotype                                                                                               | F = 4.177                                        | 3, 60                     | 0.0094                                                             |    |  |
|    |                       | Tukey's post hoc               | WT vs. Cre<br>WT vs. Flox<br>WT vs. CKO<br>Cre vs. Flox<br>Cre vs. CKO<br>Flox vs. CKO                 |                                                  |                           | > 0.05<br>> 0.05<br>> 0.05<br>< 0.05<br>< 0.05<br>< 0.05<br>> 0.05 |    |  |
|    | latency to fall (sec) | One-way ANOVA Trial 3          | Genotype                                                                                               | F = 5.548                                        | 3, 60                     | 0.002                                                              |    |  |
|    |                       | Tukey's post hoc               | WT vs. Cre<br>WT vs. Flox<br>WT vs. CKO<br>Cre vs. Flox<br>Cre vs. CKO<br>Flox vs. CKO                 |                                                  |                           | > 0.05<br>> 0.05<br>> 0.05<br>> 0.05<br>< 0.01<br>< 0.05           |    |  |
|    | latency to fall (sec) | One-way ANOVA Trial 4          | Genotype                                                                                               | F = 8.405                                        | 3, 60                     | < 0.0001                                                           |    |  |
|    |                       | Tukey's post hoc               | WT vs. Cre<br>WT vs. Flox<br>WT vs. CKO<br>Cre vs. Flox<br>Cre vs. CKO<br>Flox vs. CKO                 |                                                  |                           | > 0.05<br>> 0.05<br>> 0.05<br>> 0.05<br>< 0.001<br>< 0.05          |    |  |
|    | latency to fall (sec) | One-way ANOVA Trial 5          | Genotype                                                                                               | F = 5.388                                        | 3, 60                     | 0.0024                                                             |    |  |
|    |                       | Tukey's post hoc               | WT vs. Cre<br>WT vs. Flox<br>WT vs. CKO<br>Cre vs. Flox<br>Cre vs. CKO<br>Flox vs. CKO                 |                                                  |                           | > 0.05<br>> 0.05<br>> 0.05<br>< 0.05<br>< 0.01<br>> 0.05           |    |  |
|    | latency to fall (sec) | One-way ANOVA Trial 6          | Genotype                                                                                               | F = 3.897                                        | 3, 60                     | 0.013                                                              |    |  |
|    |                       | Tukey's post hoc               | WT vs. Cre<br>WT vs. Flox<br>WT vs. CKO<br>Cre vs. Flox<br>Cre vs. CKO<br>Flox vs. CKO                 |                                                  |                           | > 0.05<br>> 0.05<br>< 0.05<br>> 0.05<br>< 0.05<br>> 0.05           |    |  |
|    | latency to fall (sec) | One-way ANOVA Trial 7          | Genotype                                                                                               | F = 6.199                                        | 3, 60                     | 0.001                                                              |    |  |
|    |                       | Tukey's post hoc               | WT vs. Cre<br>WT vs. Flox<br>WT vs. CKO<br>Cre vs. Flox<br>Cre vs. CKO<br>Flox vs. CKO                 |                                                  |                           | > 0.05<br>> 0.05<br>< 0.05<br>> 0.05<br>< 0.001<br>> 0.05          |    |  |
|    | latency to fall (sec) | One-way ANOVA Trial 8          | Genotype                                                                                               | F = 11.05                                        | 3, 60                     | < 0.0001                                                           |    |  |
|    |                       | Tukey's post hoc               | WT vs. Cre<br>WT vs. Flox<br>WT vs. CKO<br>Cre vs. Flox<br>Cre vs. CKO<br>Flox vs. CKO                 |                                                  |                           | > 0.05<br>> 0.05<br>< 0.001<br>> 0.05<br>< 0.001<br>< 0.01         |    |  |
| 19 | latency to fall (sec) | Two-way ANOVA Repeated measure | Genotype<br>Trial<br>Interaction<br>Subjects<br>Residual                                               | F = 14.78<br>F = 11.62<br>F = 0.802<br>F = 26.35 | 3<br>7<br>21<br>44<br>308 | < 0.0001<br>< 0.0001<br>0.7172<br>< 0.0001                         | 2c |  |
|    |                       | Bonferroni post hoc Trial 1    | WT vs. Cre<br>WT vs. Flox<br>WT vs. CKO<br>Cre vs. Flox<br>Cre vs. CKO<br>Flox vs. CKO                 |                                                  |                           | > 0.05<br>> 0.05<br>< 0.001<br>> 0.05<br>< 0.001<br>< 0.01         |    |  |
|    |                       | Bonferroni post hoc Trial 2    | WT vs. Cre<br>WT vs. Flox<br>WT vs. CKO<br>Cre vs. Flox<br>Cre vs. CKO<br>Flox vs. CKO                 |                                                  |                           | > 0.05<br>> 0.05<br>< 0.001<br>> 0.05<br>< 0.001<br>< 0.05         |    |  |
|    |                       | Bonferroni post hoc Trial 3    | WT vs. Cre<br>WT vs. Flox<br>WT vs. CKO                                                                |                                                  |                           | > 0.05<br>> 0.05<br>< 0.001                                        |    |  |

|                       |                                |                                                                                        |           |       |                                                             |
|-----------------------|--------------------------------|----------------------------------------------------------------------------------------|-----------|-------|-------------------------------------------------------------|
|                       |                                | Cre vs. Flox<br>Cre vs. CKO<br>Flox vs. CKO                                            |           |       | > 0.05<br>< 0.001<br>< 0.05                                 |
|                       | Bonferroni post hoc<br>Trial 4 | WT vs. Cre<br>WT vs. Flox<br>WT vs. CKO<br>Cre vs. Flox<br>Cre vs. CKO<br>Flox vs. CKO |           |       | > 0.05<br>> 0.05<br>< 0.001<br>> 0.05<br>< 0.001<br>> 0.05  |
|                       | Bonferroni post hoc<br>Trial 5 | WT vs. Cre<br>WT vs. Flox<br>WT vs. CKO<br>Cre vs. Flox<br>Cre vs. CKO<br>Flox vs. CKO |           |       | > 0.05<br>> 0.05<br>< 0.001<br>> 0.05<br>< 0.001<br>< 0.001 |
|                       | Bonferroni post hoc<br>Trial 6 | WT vs. Cre<br>WT vs. Flox<br>WT vs. CKO<br>Cre vs. Flox<br>Cre vs. CKO<br>Flox vs. CKO |           |       | > 0.05<br>> 0.05<br>< 0.001<br>> 0.05<br>< 0.001<br>< 0.01  |
|                       | Bonferroni post hoc<br>Trial 7 | WT vs. Cre<br>WT vs. Flox<br>WT vs. CKO<br>Cre vs. Flox<br>Cre vs. CKO<br>Flox vs. CKO |           |       | > 0.05<br>> 0.05<br>< 0.001<br>> 0.05<br>< 0.001<br>< 0.01  |
|                       | Bonferroni post hoc<br>Trial 8 | WT vs. Cre<br>WT vs. Flox<br>WT vs. CKO<br>Cre vs. Flox<br>Cre vs. CKO<br>Flox vs. CKO |           |       | > 0.05<br>> 0.05<br>< 0.001<br>> 0.05<br>< 0.001<br>< 0.001 |
| latency to fall (sec) | One-way ANOVA<br>Trial 1       | Genotype                                                                               | F = 11.29 | 3, 44 | < 0.0001                                                    |
|                       | Tukey's post hoc               | WT vs. Cre<br>WT vs. Flox<br>WT vs. CKO<br>Cre vs. Flox<br>Cre vs. CKO<br>Flox vs. CKO |           |       | > 0.05<br>> 0.05<br>< 0.001<br>> 0.05<br>< 0.001<br>< 0.05  |
| latency to fall (sec) | One-way ANOVA<br>Trial 2       | Genotype                                                                               | F = 9.808 | 3, 44 | < 0.0001                                                    |
|                       | Tukey's post hoc               | WT vs. Cre<br>WT vs. Flox<br>WT vs. CKO<br>Cre vs. Flox<br>Cre vs. CKO<br>Flox vs. CKO |           |       | > 0.05<br>> 0.05<br>< 0.001<br>> 0.05<br>< 0.001<br>< 0.05  |
| latency to fall (sec) | One-way ANOVA<br>Trial 3       | Genotype                                                                               | F = 10.85 | 3, 44 | < 0.0001                                                    |
|                       | Tukey's post hoc               | WT vs. Cre<br>WT vs. Flox<br>WT vs. CKO<br>Cre vs. Flox<br>Cre vs. CKO<br>Flox vs. CKO |           |       | > 0.05<br>> 0.05<br>< 0.001<br>> 0.05<br>< 0.001<br>< 0.05  |
| latency to fall (sec) | One-way ANOVA<br>Trial 4       | Genotype                                                                               | F = 10.81 | 3, 44 | < 0.0001                                                    |
|                       | Tukey's post hoc               | WT vs. Cre<br>WT vs. Flox<br>WT vs. CKO<br>Cre vs. Flox<br>Cre vs. CKO<br>Flox vs. CKO |           |       | > 0.05<br>> 0.05<br>< 0.001<br>> 0.05<br>< 0.001<br>< 0.05  |
| latency to fall (sec) | One-way ANOVA<br>Trial 5       | Genotype                                                                               | F = 15.70 | 3, 44 | < 0.0001                                                    |
|                       | Tukey's post hoc               | WT vs. Cre<br>WT vs. Flox<br>WT vs. CKO<br>Cre vs. Flox<br>Cre vs. CKO<br>Flox vs. CKO |           |       | > 0.05<br>> 0.05<br>< 0.001<br>> 0.05<br>< 0.001<br>< 0.001 |
| latency to fall (sec) | One-way ANOVA<br>Trial 6       | Genotype                                                                               | F = 11.08 | 3, 44 | < 0.0001                                                    |
|                       | Tukey's post hoc               | WT vs. Cre<br>WT vs. Flox<br>WT vs. CKO<br>Cre vs. Flox<br>Cre vs. CKO<br>Flox vs. CKO |           |       | > 0.05<br>> 0.05<br>< 0.001<br>> 0.05<br>< 0.001<br>< 0.01  |
| latency to fall (sec) | One-way ANOVA<br>Trial 7       | Genotype                                                                               | F = 14.75 | 3, 44 | < 0.0001                                                    |
|                       | Tukey's post hoc               | WT vs. Cre<br>WT vs. Flox<br>WT vs. CKO<br>Cre vs. Flox<br>Cre vs. CKO<br>Flox vs. CKO |           |       | > 0.05<br>> 0.05<br>< 0.001<br>> 0.05<br>< 0.001<br>< 0.001 |
| latency to fall (sec) | One-way ANOVA<br>Trial 8       | Genotype                                                                               | F = 11.68 | 3, 44 | < 0.0001                                                    |
|                       | Tukey's post hoc               | WT vs. Cre                                                                             |           |       | > 0.05                                                      |

|                                                   |               |                                   |                                                                                        |                                                                                                    |                                                  |                                                             |                                                                         |     |
|---------------------------------------------------|---------------|-----------------------------------|----------------------------------------------------------------------------------------|----------------------------------------------------------------------------------------------------|--------------------------------------------------|-------------------------------------------------------------|-------------------------------------------------------------------------|-----|
|                                                   |               |                                   |                                                                                        | WT vs. Flox<br>WT vs. CKO<br>Cre vs. Flox<br>Cre vs. CKO<br>Flox vs. CKO                           |                                                  |                                                             | > 0.05<br>< 0.001<br>> 0.05<br>< 0.001<br>< 0.01                        |     |
| <i>Viaat-Mecp2<sup>+/y</sup></i><br>Dowel walk    | 9             | number of side touches            | One-way ANOVA<br>Tukey's post hoc                                                      | Genotype<br>WT vs. Cre<br>WT vs. Flox<br>WT vs. CKO<br>Cre vs. Flox<br>Cre vs. CKO<br>Flox vs. CKO | F = 39.06                                        | 3, 59                                                       | < 0.0001<br>> 0.05<br>> 0.05<br>< 0.001<br>> 0.05<br>< 0.001<br>< 0.001 | 2b  |
| <i>Viaat-Mecp2<sup>+/y</sup></i><br>Grip strength | 9             | forelimb grip strength (g)        | One-way ANOVA<br>Tukey's post hoc                                                      | Genotype<br>WT vs. Cre<br>WT vs. Flox<br>WT vs. CKO<br>Cre vs. Flox<br>Cre vs. CKO<br>Flox vs. CKO | F = 19.12                                        | 3, 59                                                       | < 0.0001<br>> 0.05<br>> 0.05<br>< 0.001<br>> 0.05<br>< 0.001<br>< 0.001 | 2e  |
| <i>Viaat-Mecp2<sup>+/y</sup></i><br>Nest building | 6             | nesting score                     | Two-way ANOVA<br>Repeated measure                                                      | Genotype<br>Time<br>Interaction<br>Subjects<br>Residual                                            | F = 60.18<br>F = 24.73<br>F = 2.169<br>F = 4.384 | 3<br>2<br>6<br>60<br>120                                    | < 0.0001<br>< 0.0001<br>< 0.05<br>< 0.0001                              | S6b |
|                                                   |               |                                   | Bonferroni post hoc<br>24 hours                                                        | WT vs. Cre<br>WT vs. Flox<br>WT vs. CKO<br>Cre vs. Flox<br>Cre vs. CKO<br>Flox vs. CKO             |                                                  |                                                             | > 0.05<br>> 0.05<br>< 0.001<br>> 0.05<br>< 0.001<br>< 0.001             |     |
|                                                   |               |                                   | Bonferroni post hoc<br>48 hours                                                        | WT vs. Cre<br>WT vs. Flox<br>WT vs. CKO<br>Cre vs. Flox<br>Cre vs. CKO<br>Flox vs. CKO             |                                                  |                                                             | > 0.05<br>> 0.05<br>< 0.001<br>> 0.05<br>< 0.001<br>< 0.001             |     |
|                                                   |               |                                   | Bonferroni post hoc<br>72 hours                                                        | WT vs. Cre<br>WT vs. Flox<br>WT vs. CKO<br>Cre vs. Flox<br>Cre vs. CKO<br>Flox vs. CKO             |                                                  |                                                             | > 0.05<br>> 0.05<br>< 0.001<br>> 0.05<br>< 0.001<br>< 0.001             |     |
|                                                   | nesting score | One-way ANOVA<br>24 hours         | Genotype                                                                               | F = 41.53                                                                                          | 3, 60                                            | < 0.0001                                                    |                                                                         |     |
|                                                   |               | Tukey's post hoc                  | WT vs. Cre<br>WT vs. Flox<br>WT vs. CKO<br>Cre vs. Flox<br>Cre vs. CKO<br>Flox vs. CKO |                                                                                                    |                                                  | > 0.05<br>> 0.05<br>< 0.001<br>> 0.05<br>< 0.001<br>< 0.001 |                                                                         |     |
|                                                   | nesting score | One-way ANOVA<br>48 hours         | Genotype                                                                               | F = 41.01                                                                                          | 3, 60                                            | < 0.0001                                                    |                                                                         |     |
|                                                   |               | Tukey's post hoc                  | WT vs. Cre<br>WT vs. Flox<br>WT vs. CKO<br>Cre vs. Flox<br>Cre vs. CKO<br>Flox vs. CKO |                                                                                                    |                                                  | > 0.05<br>> 0.05<br>< 0.001<br>> 0.05<br>< 0.001<br>< 0.001 |                                                                         |     |
|                                                   | nesting score | One-way ANOVA<br>72 hours         | Genotype                                                                               | F = 44.41                                                                                          | 3, 60                                            | < 0.0001                                                    |                                                                         |     |
|                                                   |               | Tukey's post hoc                  | WT vs. Cre<br>WT vs. Flox<br>WT vs. CKO<br>Cre vs. Flox<br>Cre vs. CKO<br>Flox vs. CKO |                                                                                                    |                                                  | > 0.05<br>> 0.05<br>< 0.001<br>> 0.05<br>< 0.001<br>< 0.001 |                                                                         |     |
| 13                                                | nesting score | Two-way ANOVA<br>Repeated measure | Genotype<br>Trial<br>Interaction<br>Subjects<br>Residual                               | F = 80.80<br>F = 12.16<br>F = 1.233<br>F = 1.684                                                   | 3<br>2<br>6<br>56<br>112                         | < 0.0001<br>< 0.0001<br>0.01<br>0.2947                      | 2j                                                                      |     |
|                                                   |               | Bonferroni post hoc<br>24 hours   | WT vs. Cre<br>WT vs. Flox<br>WT vs. CKO<br>Cre vs. Flox<br>Cre vs. CKO<br>Flox vs. CKO |                                                                                                    |                                                  | > 0.05<br>> 0.05<br>< 0.001<br>> 0.05<br>< 0.001<br>< 0.001 |                                                                         |     |
|                                                   |               | Bonferroni post hoc<br>48 hours   | WT vs. Cre<br>WT vs. Flox<br>WT vs. CKO<br>Cre vs. Flox<br>Cre vs. CKO<br>Flox vs. CKO |                                                                                                    |                                                  | > 0.05<br>> 0.05<br>< 0.001<br>> 0.05<br>< 0.001<br>< 0.001 |                                                                         |     |
|                                                   |               | Bonferroni post hoc<br>72 hours   | WT vs. Cre<br>WT vs. Flox<br>WT vs. CKO<br>Cre vs. Flox<br>Cre vs. CKO<br>Flox vs. CKO |                                                                                                    |                                                  | > 0.05<br>> 0.05<br>< 0.001<br>> 0.05<br>< 0.001<br>< 0.001 |                                                                         |     |

|                                              |       |                        |                                                  |                                                                                        |                                                  |                          |                                                             |     |
|----------------------------------------------|-------|------------------------|--------------------------------------------------|----------------------------------------------------------------------------------------|--------------------------------------------------|--------------------------|-------------------------------------------------------------|-----|
|                                              |       | nesting score          | One-way ANOVA<br>24 hours                        | Genotype                                                                               | F = 24.98                                        | 3, 56                    | < 0.0001                                                    |     |
|                                              |       |                        | Tukey's post hoc                                 | WT vs. Cre<br>WT vs. Flox<br>WT vs. CKO<br>Cre vs. Flox<br>Cre vs. CKO<br>Flox vs. CKO |                                                  |                          | > 0.05<br>> 0.05<br>< 0.001<br>> 0.05<br>< 0.001<br>< 0.001 |     |
|                                              |       | nesting score          | One-way ANOVA<br>48 hours                        | Genotype                                                                               | F = 24.21                                        | 3, 56                    | < 0.0001                                                    |     |
|                                              |       |                        | Tukey's post hoc                                 | WT vs. Cre<br>WT vs. Flox<br>WT vs. CKO<br>Cre vs. Flox<br>Cre vs. CKO<br>Flox vs. CKO |                                                  |                          | > 0.05<br>> 0.05<br>< 0.001<br>> 0.05<br>< 0.001<br>< 0.001 |     |
|                                              |       | nesting score          | One-way ANOVA<br>72 hours                        | Genotype                                                                               | F = 15.10                                        | 3, 56                    | < 0.0001                                                    |     |
|                                              |       |                        | Tukey's post hoc                                 | WT vs. Cre<br>WT vs. Flox<br>WT vs. CKO<br>Cre vs. Flox<br>Cre vs. CKO<br>Flox vs. CKO |                                                  |                          | > 0.05<br>> 0.05<br>< 0.001<br>> 0.05<br>< 0.001<br>< 0.001 |     |
| Viaat-Mecp2 <sup>+/y</sup><br>Partition test | 6     | interaction time (sec) | Two-way ANOVA<br>Repeated measure                | Genotype<br>Trial<br>Interaction<br>Subjects<br>Residual                               | F = 1.202<br>F = 120.6<br>F = 0.527<br>F = 3.261 | 3<br>2<br>6<br>56<br>120 | 0.3168<br>< 0.0001<br>0.7867<br>< 0.0001                    | S6c |
|                                              |       |                        | Bonferroni post hoc<br>Familiar<br>1st encounter | WT vs. Cre<br>WT vs. Flox<br>WT vs. CKO<br>Cre vs. Flox<br>Cre vs. CKO<br>Flox vs. CKO |                                                  |                          | > 0.05<br>> 0.05<br>> 0.05<br>> 0.05<br>> 0.05<br>> 0.05    |     |
|                                              |       |                        | Bonferroni post hoc<br>Novel                     | WT vs. Cre<br>WT vs. Flox<br>WT vs. CKO<br>Cre vs. Flox<br>Cre vs. CKO<br>Flox vs. CKO |                                                  |                          | > 0.05<br>> 0.05<br>> 0.05<br>> 0.05<br>> 0.05<br>> 0.05    |     |
|                                              |       |                        | Bonferroni post hoc<br>Familiar<br>2nd encounter | WT vs. Cre<br>WT vs. Flox<br>WT vs. CKO<br>Cre vs. Flox<br>Cre vs. CKO<br>Flox vs. CKO |                                                  |                          | > 0.05<br>> 0.05<br>> 0.05<br>> 0.05<br>> 0.05<br>> 0.05    |     |
|                                              |       | interaction time (sec) | One-way ANOVA<br>1st Familiar                    | Genotype                                                                               | F = 0.8342                                       | 3, 60                    | 0.4804                                                      |     |
|                                              |       |                        | Tukey's post hoc                                 | no post tests p > 0.05                                                                 |                                                  |                          |                                                             |     |
|                                              |       | interaction time (sec) | One-way ANOVA<br>Novel                           | Genotype                                                                               | F = 0.9969                                       | 3, 60                    | 0.4006                                                      |     |
|                                              |       |                        | Tukey's post hoc                                 | no post tests p > 0.05                                                                 |                                                  |                          |                                                             |     |
|                                              |       | interaction time (sec) | One-way ANOVA<br>2nd Familiar                    | Genotype                                                                               | F = 0.9724                                       | 3, 60                    | 0.4118                                                      |     |
|                                              |       |                        | Tukey's post hoc                                 | no post tests p > 0.05                                                                 |                                                  |                          |                                                             |     |
|                                              | 12-13 | interaction time (sec) | Two-way ANOVA<br>Repeated measure                | Genotype<br>Trial<br>Interaction<br>Subjects<br>Residual                               | F = 17.65<br>F = 169.6<br>F = 5.017<br>F = 4.781 | 3<br>2<br>6<br>56<br>112 | < 0.0001<br>< 0.0001<br>0.0001<br>< 0.0001                  | 2g  |
|                                              |       |                        | Bonferroni post hoc<br>Familiar<br>1st encounter | WT vs. Cre<br>WT vs. Flox<br>WT vs. CKO<br>Cre vs. Flox<br>Cre vs. CKO<br>Flox vs. CKO |                                                  |                          | > 0.05<br>> 0.05<br>> 0.05<br>> 0.05<br>> 0.05<br>> 0.05    |     |
|                                              |       |                        | Bonferroni post hoc<br>Novel                     | WT vs. Cre<br>WT vs. Flox<br>WT vs. CKO<br>Cre vs. Flox<br>Cre vs. CKO<br>Flox vs. CKO |                                                  |                          | > 0.05<br>> 0.05<br>< 0.001<br>> 0.05<br>< 0.001<br>< 0.01  |     |
|                                              |       |                        | Bonferroni post hoc<br>Familiar<br>2nd encounter | WT vs. Cre<br>WT vs. Flox<br>WT vs. CKO<br>Cre vs. Flox<br>Cre vs. CKO<br>Flox vs. CKO |                                                  |                          | > 0.05<br>> 0.05<br>< 0.01<br>> 0.05<br>< 0.01<br>> 0.05    |     |
|                                              |       | interaction time (sec) | One-way ANOVA<br>1st Familiar                    | Genotype                                                                               | F = 11.68                                        | 3, 56                    | < 0.0001                                                    |     |
|                                              |       |                        | Tukey's post hoc                                 | WT vs. Cre<br>WT vs. Flox<br>WT vs. CKO<br>Cre vs. Flox<br>Cre vs. CKO<br>Flox vs. CKO |                                                  |                          | > 0.05<br>> 0.05<br>< 0.001<br>> 0.05<br>< 0.001<br>< 0.01  |     |
|                                              |       | interaction time (sec) | One-way ANOVA<br>Novel                           | Genotype                                                                               | F = 17.40                                        | 3, 56                    | < 0.0001                                                    |     |
|                                              |       |                        | Tukey's post hoc                                 | WT vs. Cre<br>WT vs. Flox                                                              |                                                  |                          | > 0.05<br>> 0.05                                            |     |

|                                                                    |       |                                                       |                                                                                                                               |                                                                                        |                                      |                    |                                                            |     |
|--------------------------------------------------------------------|-------|-------------------------------------------------------|-------------------------------------------------------------------------------------------------------------------------------|----------------------------------------------------------------------------------------|--------------------------------------|--------------------|------------------------------------------------------------|-----|
|                                                                    |       |                                                       |                                                                                                                               | WT vs. CKO<br>Cre vs. Flox<br>Cre vs. CKO<br>Flox vs. CKO                              |                                      |                    | < 0.001<br>> 0.05<br>< 0.001<br>< 0.01                     |     |
|                                                                    |       | interaction time (sec)                                | One-way ANOVA<br>2nd Familiar<br>Tukey's post hoc                                                                             | Genotype                                                                               | F = 10.09                            | 3, 56              | < 0.0001                                                   |     |
|                                                                    |       |                                                       |                                                                                                                               | WT vs. Cre<br>WT vs. Flox<br>WT vs. CKO<br>Cre vs. Flox<br>Cre vs. CKO<br>Flox vs. CKO |                                      |                    | > 0.05<br>> 0.05<br>< 0.001<br>> 0.05<br>< 0.001<br>< 0.05 |     |
| <i>Viaat-Mecp2<sup>+/y</sup></i><br>3-Chamber<br>Habituation phase | 13    | total time in left chamber (sec)                      | One-way ANOVA<br>Tukey's post hoc                                                                                             | Genotype                                                                               | F = 0.2299                           | 3, 52              | 0.8752                                                     | S6d |
|                                                                    |       | total time in center chamber (sec)                    | One-way ANOVA<br>Tukey's post hoc                                                                                             | Genotype                                                                               | F = 4.829                            | 3, 52              |                                                            | S6d |
|                                                                    |       |                                                       |                                                                                                                               | WT vs. Cre<br>WT vs. Flox<br>WT vs. CKO<br>Cre vs. Flox<br>Cre vs. CKO<br>Flox vs. CKO |                                      |                    | > 0.05<br>< 0.05<br>< 0.05<br>> 0.05<br>> 0.05<br>> 0.05   |     |
|                                                                    |       | total time in right chamber (sec)                     | One-way ANOVA<br>Tukey's post hoc                                                                                             | Genotype                                                                               | F = 1.215                            | 3, 52              | 0.3135                                                     | S6d |
|                                                                    |       | interaction time inanimate left cage (sec)            | One-way ANOVA<br>Tukey's post hoc                                                                                             | Genotype                                                                               | F = 0.5016                           | 3, 52              | 0.6828                                                     | S6e |
|                                                                    |       | interaction time inanimate right cage (sec)           | One-way ANOVA<br>Tukey's post hoc                                                                                             | Genotype                                                                               | F = 2.393                            | 3, 52              | 0.0790                                                     | S6e |
| <i>Viaat-Mecp2<sup>+/y</sup></i><br>3-Chamber<br>Social phase      | 13    | total time in chamber with inanimate empty cage (sec) | One-way ANOVA<br>Tukey's post hoc                                                                                             | Genotype                                                                               | F = 1.391                            | 3, 52              | 0.2558                                                     | S6f |
|                                                                    |       | total time in center chamber (sec)                    | One-way ANOVA<br>Tukey's post hoc                                                                                             | Genotype                                                                               | F = 1.486                            | 3, 52              | 0.2291                                                     | S6f |
|                                                                    |       | total time in chamber with stranger mouse (sec)       | One-way ANOVA<br>Tukey's post hoc                                                                                             | Genotype                                                                               | F = 0.7328                           | 3, 52              | 0.5371                                                     | S6f |
|                                                                    |       | interaction time with inanimate empty cage (sec)      | One-way ANOVA<br>Tukey's post hoc                                                                                             | Genotype                                                                               | F = 1.075                            | 3, 52              | 0.3678                                                     | 2h  |
|                                                                    |       | interaction time with stranger mouse(sec)             | One-way ANOVA<br>Tukey's post hoc                                                                                             | Genotype                                                                               | F = 8.168                            | 3, 52              | < 0.0001                                                   | 2h  |
|                                                                    |       |                                                       |                                                                                                                               | WT vs. Cre<br>WT vs. Flox<br>WT vs. CKO<br>Cre vs. Flox<br>Cre vs. CKO<br>Flox vs. CKO |                                      |                    | > 0.05<br>> 0.05<br>< 0.01<br>> 0.05<br>< 0.001<br>< 0.05  |     |
| <i>Viaat-Mecp2<sup>+/y</sup></i><br>Novel object                   | 11-12 | interaction time (sec)                                | One-way ANOVA<br>Tukey's post hoc                                                                                             | Genotype                                                                               | F = 0.1147                           | 3, 52              | 0.9511                                                     | 2i  |
| <i>Viaat-Mecp2<sup>+/y</sup></i><br>Prepulse inhibition (PPI)      | 8     | maximum response to 120 dB (A.U.)                     | One-way ANOVA<br>Tukey's post hoc                                                                                             | Genotype                                                                               | F = 19.52                            | 3, 60              | < 0.0001                                                   | 2k  |
|                                                                    |       | % prepulse inhibition                                 | Two-way ANOVA<br>Bonferroni post hoc<br>74 (+4) dB<br>Bonferroni post hoc<br>78 (+8) dB<br>Bonferroni post hoc<br>82 (+12) dB | Genotype<br>Prepulse level<br>Interaction<br>Residual                                  | F = 16.18<br>F = 49.52<br>F = 0.8517 | 3<br>2<br>6<br>180 | < 0.0001<br>< 0.0001<br>0.5317                             | 2l  |
|                                                                    |       |                                                       |                                                                                                                               | WT vs. Cre<br>WT vs. Flox<br>WT vs. CKO<br>Cre vs. Flox<br>Cre vs. CKO<br>Flox vs. CKO |                                      |                    | > 0.05<br>> 0.05<br>< 0.05<br>> 0.05<br>> 0.05<br>> 0.05   |     |
|                                                                    |       |                                                       |                                                                                                                               | WT vs. Cre<br>WT vs. Flox<br>WT vs. CKO<br>Cre vs. Flox<br>Cre vs. CKO<br>Flox vs. CKO |                                      |                    | > 0.05<br>> 0.05<br>< 0.001<br>> 0.05<br>< 0.05<br>< 0.01  |     |
|                                                                    |       |                                                       |                                                                                                                               | WT vs. Cre<br>WT vs. Flox<br>WT vs. CKO<br>Cre vs. Flox<br>Cre vs. CKO<br>Flox vs. CKO |                                      |                    | > 0.05<br>> 0.05<br>< 0.001<br>> 0.05<br>< 0.05<br>< 0.01  |     |
|                                                                    |       | % prepulse inhibition                                 | One-way ANOVA<br>74 (+4) dB<br>Tukey's post hoc                                                                               | Genotype                                                                               | F=2.422                              | 3, 60              | 0.0747                                                     |     |
|                                                                    |       | % prepulse inhibition                                 | One-way ANOVA<br>78 (+8) dB                                                                                                   | Genotype                                                                               | F = 8.143                            | 3, 60              | < 0.0001                                                   |     |

|                                                     |       |                                      |                                       |                                                                                        |                                                   |                          |                                                           |    |
|-----------------------------------------------------|-------|--------------------------------------|---------------------------------------|----------------------------------------------------------------------------------------|---------------------------------------------------|--------------------------|-----------------------------------------------------------|----|
|                                                     |       |                                      | Tukey's post hoc<br>78 (+8) dB        | WT vs. Cre<br>WT vs. Flox<br>WT vs. CKO<br>Cre vs. Flox<br>Cre vs. CKO<br>Flox vs. CKO |                                                   |                          | > 0.05<br>> 0.05<br>< 0.001<br>> 0.05<br>< 0.05<br>< 0.01 |    |
|                                                     |       | % prepulse inhibition                | One-way ANOVA<br>82 (+12) dB          | Genotype                                                                               | F = 8.733                                         | 3, 60                    | < 0.0001                                                  |    |
|                                                     |       |                                      | Tukey's post hoc<br>82 (+12) dB       | WT vs. Cre<br>WT vs. Flox<br>WT vs. CKO<br>Cre vs. Flox<br>Cre vs. CKO<br>Flox vs. CKO |                                                   |                          | > 0.05<br>> 0.05<br>< 0.001<br>> 0.05<br>< 0.01<br>< 0.01 |    |
| <i>Viaat-Mecp2<sup>Y</sup></i><br>Morris water maze | 10-11 | training trials, normalized distance | Two-way ANOVA<br>Repeated measure     | Genotype<br>Training day<br>Interaction<br>Subjects<br>Residual                        | F = 0.7207<br>F = 96.64<br>F = 1.082<br>F = 2.609 | 3<br>3<br>9<br>52<br>156 | 0.5441<br>< 0.0001<br>0.3792<br>< 0.0001                  | 2m |
|                                                     |       |                                      | Bonferroni post hoc<br>Training day 1 | WT vs. Cre<br>WT vs. Flox<br>WT vs. CKO<br>Cre vs. Flox<br>Cre vs. CKO<br>Flox vs. CKO |                                                   |                          | > 0.05<br>> 0.05<br>> 0.05<br>> 0.05<br>> 0.05<br>> 0.05  |    |
|                                                     |       |                                      | Bonferroni post hoc<br>Training day 2 | WT vs. Cre<br>WT vs. Flox<br>WT vs. CKO<br>Cre vs. Flox<br>Cre vs. CKO<br>Flox vs. CKO |                                                   |                          | > 0.05<br>> 0.05<br>> 0.05<br>> 0.05<br>> 0.05<br>> 0.05  |    |
|                                                     |       |                                      | Bonferroni post hoc<br>Training day 3 | WT vs. Cre<br>WT vs. Flox<br>WT vs. CKO<br>Cre vs. Flox<br>Cre vs. CKO<br>Flox vs. CKO |                                                   |                          | > 0.05<br>> 0.05<br>> 0.05<br>> 0.05<br>> 0.05<br>> 0.05  |    |
|                                                     |       |                                      | Bonferroni post hoc<br>Training day 4 | WT vs. Cre<br>WT vs. Flox<br>WT vs. CKO<br>Cre vs. Flox<br>Cre vs. CKO<br>Flox vs. CKO |                                                   |                          | > 0.05<br>> 0.05<br>> 0.05<br>> 0.05<br>> 0.05<br>> 0.05  |    |
|                                                     |       | training trials, normalized distance | One-way ANOVA<br>Training day 2       | Genotype                                                                               | F = 2.511                                         | 3, 52                    | 0.0688                                                    |    |
|                                                     |       |                                      | Tukey's post hoc                      | no post tests p > 0.05                                                                 |                                                   |                          |                                                           |    |
|                                                     |       | training trials, normalized distance | One-way ANOVA<br>Training day 3       | Genotype                                                                               | F = 0.1485                                        | 3, 52                    | 0.9302                                                    |    |
|                                                     |       |                                      | Tukey's post hoc                      | no post tests p > 0.05                                                                 |                                                   |                          |                                                           |    |
|                                                     |       | training trials, normalized distance | One-way ANOVA<br>Training day 4       | Genotype                                                                               | F = 0.8396                                        | 3, 52                    | 0.4783                                                    |    |
|                                                     |       |                                      | Tukey's post hoc                      | no post tests p > 0.05                                                                 |                                                   |                          |                                                           |    |
|                                                     | 10-11 | probe test, % platform crossings     | Two-way ANOVA                         | Genotype<br>Platform<br>Interaction<br>Residual                                        | F = 1.447<br>F = 12.00<br>F = 4.735               | 3<br>3<br>9<br>208       | 0.2303<br>< 0.0001<br>< 0.0001                            | 2n |
|                                                     |       |                                      | Bonferroni post hoc<br>Left           | WT vs. Cre<br>WT vs. Flox<br>WT vs. CKO<br>Cre vs. Flox<br>Cre vs. CKO<br>Flox vs. CKO |                                                   |                          | > 0.05<br>> 0.05<br>< 0.01<br>> 0.05<br>> 0.05<br>< 0.01  |    |
|                                                     |       |                                      | Bonferroni post hoc<br>Opposite       | WT vs. Cre<br>WT vs. Flox<br>WT vs. CKO<br>Cre vs. Flox<br>Cre vs. CKO<br>Flox vs. CKO |                                                   |                          | > 0.05<br>> 0.05<br>> 0.05<br>> 0.05<br>> 0.05<br>> 0.05  |    |
|                                                     |       |                                      | Bonferroni post hoc<br>Right          | WT vs. Cre<br>WT vs. Flox<br>WT vs. CKO<br>Cre vs. Flox<br>Cre vs. CKO<br>Flox vs. CKO |                                                   |                          | > 0.05<br>> 0.05<br>> 0.05<br>> 0.05<br>> 0.05<br>> 0.05  |    |
|                                                     |       |                                      | Bonferroni post hoc<br>Target         | WT vs. Cre<br>WT vs. Flox<br>WT vs. CKO<br>Cre vs. Flox<br>Cre vs. CKO<br>Flox vs. CKO |                                                   |                          | > 0.05<br>< 0.05<br>< 0.05<br>> 0.05<br>< 0.05<br>< 0.001 |    |
|                                                     |       | probe test, % platform crossings     | One-way ANOVA<br>Left                 | Genotype                                                                               | F = 3.243                                         | 3, 52                    | < 0.05                                                    |    |
|                                                     |       |                                      | Tukey's post hoc                      | WT vs. Cre<br>WT vs. Flox<br>WT vs. CKO<br>Cre vs. Flox                                |                                                   |                          | > 0.05<br>> 0.05<br>> 0.05<br>> 0.05                      |    |

|                                                           |    |                                   |                                                                                                    |                                                                                                                                                                                                                              |                                                 |                          |                                                                                                                                                                             |     |
|-----------------------------------------------------------|----|-----------------------------------|----------------------------------------------------------------------------------------------------|------------------------------------------------------------------------------------------------------------------------------------------------------------------------------------------------------------------------------|-------------------------------------------------|--------------------------|-----------------------------------------------------------------------------------------------------------------------------------------------------------------------------|-----|
|                                                           |    |                                   |                                                                                                    | Cre vs. CKO<br>Flox vs. CKO                                                                                                                                                                                                  |                                                 |                          | > 0.05<br>> 0.05                                                                                                                                                            |     |
|                                                           |    | probe test, % platform crossings  | One-way ANOVA<br>Opposite<br>Tukey's post hoc                                                      | Genotype<br>no post tests $p > 0.05$                                                                                                                                                                                         | F = 1.002                                       | 3, 52                    | 0.3996                                                                                                                                                                      |     |
|                                                           |    | probe test, % platform crossings  | One-way ANOVA<br>Right<br>Tukey's post hoc                                                         | Genotype<br>no post tests $p > 0.05$                                                                                                                                                                                         | F = 0.9695                                      | 3, 52                    | 0.4142                                                                                                                                                                      |     |
|                                                           |    | probe test, % platform crossings  | One-way ANOVA<br>Target<br>Tukey's post hoc                                                        | Genotype<br>WT vs. Cre<br>WT vs. Flox<br>WT vs. CKO<br>Cre vs. Flox<br>Cre vs. CKO<br>Flox vs. CKO                                                                                                                           | F = 11.93                                       | 3, 52                    | < 0.0001<br>> 0.05<br>> 0.05<br>< 0.001<br>> 0.05<br>< 0.05<br>< 0.001                                                                                                      |     |
| <i>Viaat-Mecp2<sup>+/y</sup></i><br>Light-dark            | 5  | time in light side (sec)          | One-way ANOVA<br>Tukey's post hoc                                                                  | Genotype<br>no post tests $p > 0.05$                                                                                                                                                                                         | F = 2.301                                       | 3, 60                    | 0.0862                                                                                                                                                                      | S5a |
|                                                           |    | number of entries into light side | One-way ANOVA<br>Tukey's post hoc                                                                  | Genotype<br>WT vs. Cre<br>WT vs. Flox<br>WT vs. CKO<br>Cre vs. Flox<br>Cre vs. CKO<br>Flox vs. CKO                                                                                                                           | F = 3.095                                       | 3, 60                    | < 0.05<br>> 0.05<br>> 0.05<br>> 0.05<br>> 0.05<br>> 0.05<br>> 0.05                                                                                                          | S5b |
| <i>Viaat-Mecp2<sup>+/y</sup></i><br>Open field assay      | 5  | center distance (cm)              | One-way ANOVA<br>Tukey's post hoc                                                                  | Genotype<br>WT vs. Cre<br>WT vs. Flox<br>WT vs. CKO<br>Cre vs. Flox<br>Cre vs. CKO<br>Flox vs. CKO                                                                                                                           | F = 2.301                                       | 3, 84                    | < 0.0001<br>> 0.05<br>< 0.01<br>< 0.001<br>> 0.05<br>> 0.05<br>> 0.05                                                                                                       | S5c |
|                                                           |    | ratio center to total distance    | One-way ANOVA<br>Tukey's post hoc                                                                  | Genotype<br>WT vs. Cre<br>WT vs. Flox<br>WT vs. CKO<br>Cre vs. Flox<br>Cre vs. CKO<br>Flox vs. CKO                                                                                                                           | F = 6.245                                       | 3, 84                    | 0.0007<br>> 0.05<br>< 0.01<br>< 0.01<br>> 0.05<br>> 0.05<br>> 0.05                                                                                                          | S5d |
| <i>Viaat-Mecp2<sup>+/y</sup></i><br>Elevated plus maze    | 5  | protected time (sec)              | One-way ANOVA<br>Tukey's post hoc                                                                  | Genotype<br>WT vs. Cre<br>WT vs. Flox<br>WT vs. CKO<br>Cre vs. Flox<br>Cre vs. CKO<br>Flox vs. CKO                                                                                                                           | F = 4.142                                       | 3, 60                    | 0.0098<br>> 0.05<br>> 0.05<br>> 0.05<br>> 0.05<br>< 0.05<br>> 0.05                                                                                                          | S5e |
|                                                           |    | unprotected time (sec)            | One-way ANOVA<br>Tukey's post hoc                                                                  | Genotype<br>WT vs. Cre<br>WT vs. Flox<br>WT vs. CKO<br>Cre vs. Flox<br>Cre vs. CKO<br>Flox vs. CKO                                                                                                                           | F = 4.142                                       | 3, 60                    | 0.0098<br>> 0.05<br>> 0.05<br>> 0.05<br>> 0.05<br>< 0.05<br>> 0.05                                                                                                          | S5f |
|                                                           |    | number protected rears            | One-way ANOVA<br>Tukey's post hoc                                                                  | Genotype<br>WT vs. Cre<br>WT vs. Flox<br>WT vs. CKO<br>Cre vs. Flox<br>Cre vs. CKO<br>Flox vs. CKO                                                                                                                           | F = 14.97                                       | 3, 60                    | < 0.0001<br>> 0.05<br>< 0.01<br>< 0.001<br>< 0.001<br>< 0.001<br>> 0.05                                                                                                     | S5g |
|                                                           |    | number unprotected rears          | One-way ANOVA<br>Tukey's post hoc                                                                  | Genotype<br>WT vs. Cre<br>WT vs. Flox<br>WT vs. CKO<br>Cre vs. Flox<br>Cre vs. CKO<br>Flox vs. CKO                                                                                                                           | F = 6.568                                       | 3, 60                    | 0.0006<br>> 0.05<br>< 0.05<br>< 0.01<br>> 0.05<br>< 0.01<br>< 0.01                                                                                                          | S5h |
| <i>Viaat-Mecp2<sup>+/y</sup></i><br>Olfactory recognition | 11 | sniffing time (s)                 | Two-way ANOVA<br>Repeated measure<br>Bonferroni post hoc<br>Mock<br>Bonferroni post hoc<br>Vanilla | Genotype<br>Trial<br>Interaction<br>Subjects<br>Residual<br>WT vs. Cre<br>WT vs. Flox<br>WT vs. CKO<br>Cre vs. Flox<br>Cre vs. CKO<br>Flox vs. CKO<br>WT vs. Cre<br>WT vs. Flox<br>WT vs. CKO<br>Cre vs. Flox<br>Cre vs. CKO | F = 4.91<br>F = 97.01<br>F = 3.402<br>F = 1.086 | 3<br>2<br>6<br>92<br>184 | 0.0033<br>< 0.0001<br>0.0033<br>0.3163<br>> 0.05<br>> 0.05<br>> 0.05<br>> 0.05<br>> 0.05<br>> 0.05<br>> 0.05<br>> 0.05<br>< 0.001<br>> 0.05<br>< 0.001<br>> 0.05<br>< 0.001 | S7a |



|                                                            |    |                   |                                   |                                                                                                        |                                                   |                         |                                                                     |     |
|------------------------------------------------------------|----|-------------------|-----------------------------------|--------------------------------------------------------------------------------------------------------|---------------------------------------------------|-------------------------|---------------------------------------------------------------------|-----|
|                                                            |    |                   | Bonferroni post hoc<br>Water      | Flox vs. CKO<br>WT vs. Cre<br>WT vs. Flox<br>WT vs. CKO<br>Cre vs. Flox<br>Cre vs. CKO<br>Flox vs. CKO |                                                   |                         | < 0.001<br>> 0.05<br>> 0.05<br>> 0.05<br>> 0.05<br>> 0.05<br>> 0.05 |     |
|                                                            |    | sniffing time (s) | One-way ANOVA<br>Mock             | Genotype                                                                                               | F = 0.9237                                        | 3, 92                   | 0.4326                                                              |     |
|                                                            |    |                   | Tukey's post hoc                  | no post tests p > 0.05                                                                                 |                                                   |                         |                                                                     |     |
|                                                            |    | sniffing time (s) | One-way ANOVA<br>Vanilla          | Genotype                                                                                               | F = 4.204                                         | 3, 92                   | 0.0078                                                              |     |
|                                                            |    |                   | Tukey's post hoc                  | WT vs. Cre<br>WT vs. Flox<br>WT vs. CKO<br>Cre vs. Flox<br>Cre vs. CKO<br>Flox vs. CKO                 |                                                   |                         | > 0.05<br>> 0.05<br>< 0.05<br>> 0.05<br>< 0.05<br>< 0.05            |     |
|                                                            |    | sniffing time (s) | One-way ANOVA<br>Water            | Genotype                                                                                               | F = 2.424                                         | 3, 92                   | 0.0708                                                              |     |
|                                                            |    |                   | Tukey's post hoc                  | no post tests p > 0.05                                                                                 |                                                   |                         |                                                                     |     |
| <i>Viaat-Mecp2<sup>fl/y</sup></i><br>Olfactory habituation | 11 | sniffing time (s) | Two-way ANOVA<br>Repeated measure | Genotype<br>Trial<br>Interaction<br>Subjects<br>Residual                                               | F = 4.894<br>F = 122.7<br>F = 3.791<br>F = 0.9632 | 3<br>1<br>3<br>92<br>92 | 0.0033<br>< 0.0001<br>0.0130<br>0.5711                              | S7b |
|                                                            |    |                   | Bonferroni post hoc<br>Day 1      | WT vs. Cre<br>WT vs. Flox<br>WT vs. CKO<br>Cre vs. Flox<br>Cre vs. CKO<br>Flox vs. CKO                 |                                                   |                         | > 0.05<br>> 0.05<br>< 0.001<br>> 0.05<br>< 0.001<br>< 0.01          |     |
|                                                            |    |                   | Bonferroni post hoc<br>Day 2      | WT vs. Cre<br>WT vs. Flox<br>WT vs. CKO<br>Cre vs. Flox<br>Cre vs. CKO<br>Flox vs. CKO                 |                                                   |                         | > 0.05<br>> 0.05<br>> 0.05<br>> 0.05<br>> 0.05<br>> 0.05            |     |
|                                                            |    | sniffing time (s) | One-way ANOVA<br>Day 1            | Genotype                                                                                               | F = 4.204                                         | 3, 92                   | 0.0078                                                              |     |
|                                                            |    |                   | Tukey's post hoc                  | WT vs. Cre<br>WT vs. Flox<br>WT vs. CKO<br>Cre vs. Flox<br>Cre vs. CKO<br>Flox vs. CKO                 |                                                   |                         | > 0.05<br>> 0.05<br>< 0.05<br>> 0.05<br>< 0.05<br>< 0.05            |     |
|                                                            |    | sniffing time (s) | One-way ANOVA<br>Day 2            | Genotype                                                                                               | F = 1.656                                         | 3, 92                   | 0.1990                                                              |     |
|                                                            |    |                   | Tukey's post hoc                  | no post tests p > 0.05                                                                                 |                                                   |                         |                                                                     |     |
