# Supplementary material
Source: PubMed Central journal article supplement (PMC3057962)
Supplement: NIHMS245935-supplement-3.pdf [file NIHMS245935-supplement-3.pdf]

**Supplemental Table 3: Statistical summary of behavioral data for *Dlx5/6-Mecp2<sup>fl/y</sup>* mice**

| Behavioral Paradigm                                                             | Age (wks) | Measurement                                          | Statistical Test    | Comparison                                                                             | Statistics | df, residual | p                                                        | Figure |
|---------------------------------------------------------------------------------|-----------|------------------------------------------------------|---------------------|----------------------------------------------------------------------------------------|------------|--------------|----------------------------------------------------------|--------|
| <i>Dlx5/6-Mecp2<sup>fl/y</sup></i><br>Grooming                                  | 12        | percent grooming time (%)                            | One-way ANOVA       | Genotype                                                                               | F = 1.375  | 3, 47        | 0.2619                                                   | 4b     |
|                                                                                 |           |                                                      | Tukey's post hoc    | no post tests $p > 0.05$                                                               |            |              |                                                          |        |
| <i>Dlx5/6-Mecp2<sup>fl/y</sup></i><br>Holeboard                                 | 12        | number of holes with 2 or more sequential nose pokes | Kruskal-Wallis      |                                                                                        | H = 14.92  | 3            | 0.0019                                                   | 4c     |
|                                                                                 |           |                                                      | Dunn's post-hoc     | WT vs. Cre<br>WT vs. Flox<br>WT vs. CKO<br>Cre vs. Flox<br>Cre vs. CKO<br>Flox vs. CKO |            |              | > 0.05<br>> 0.05<br>< 0.05<br>> 0.05<br>< 0.05<br>< 0.01 |        |
| <i>Dlx5/6-Mecp2<sup>fl/y</sup></i><br>Hot Plate                                 | 12        | time to hindlimb response (sec)                      | One-way ANOVA       | Genotype                                                                               | F = 2.920  | 3, 60        | 0.0413                                                   | S11a   |
|                                                                                 |           |                                                      | Tukey's post hoc    | WT vs. Cre<br>WT vs. Flox<br>WT vs. CKO<br>Cre vs. Flox<br>Cre vs. CKO<br>Flox vs. CKO |            |              | > 0.05<br>> 0.05<br>> 0.05<br>> 0.05<br>> 0.05<br>< 0.05 |        |
| <i>Dlx5/6-Mecp2<sup>fl/y</sup></i><br>Tail Flick                                | 12        | time to tail flick response (sec)                    | One-way ANOVA       | Genotype                                                                               | F = 1.225  | 3, 60        | 0.3084                                                   | S11b   |
|                                                                                 |           |                                                      | Tukey's post hoc    | no post tests $p > 0.05$                                                               |            |              |                                                          |        |
| <i>Dlx5/6-Mecp2<sup>fl/y</sup></i><br>Open Field Assay:<br>Exploratory Activity | 5         | total distance traveled (cm)                         | One-way ANOVA       | Genotype                                                                               | F = 2.325  | 3, 60        | 0.0839                                                   | S9b    |
|                                                                                 | 19        | total distance traveled (cm)                         | One-way ANOVA       | Genotype                                                                               | F = 3.100  | 3, 60        | 0.0333                                                   | 4h     |
| <i>Dlx5/6-Mecp2<sup>fl/y</sup></i><br>Footslip                                  | 5         | # slips per 100 beam breaks                          | One-way ANOVA       | Genotype                                                                               | F = 26.20  | 3, 56        | < 0.0001                                                 | S9c    |
|                                                                                 | 22        | # slips per 100 beam breaks                          | One-way ANOVA       | Genotype                                                                               | F = 33.31  | 3, 60        | < 0.0001                                                 | 4d     |
| <i>Dlx5/6-Mecp2<sup>fl/y</sup></i><br>Wire Hang                                 | 9         | latency to fall (sec)                                | One-way ANOVA       | Genotype                                                                               | F = 4.912  | 3, 60        | 0.0041                                                   | S9d    |
|                                                                                 | 19        | latency to fall (sec)                                | One-way ANOVA       | Genotype                                                                               | F = 9.318  | 3, 60        | < 0.0001                                                 | 4e     |
| <i>Dlx5/6-Mecp2<sup>fl/y</sup></i><br>Dowel walk                                | 9         | number of side touches                               | One-way ANOVA       | Genotype                                                                               | F = 5.784  | 3, 60        | 0.0015                                                   | S9e    |
|                                                                                 | 19        | number of side touches                               | One-way ANOVA       | Genotype                                                                               | F = 32.91  | 3, 60        | < 0.0001                                                 | 4f     |
| <i>Dlx5/6-Mecp2<sup>fl/y</sup></i><br>Accelerating Rotarod                      | 5         | latency to fall (sec)                                | Two-way ANOVA       | Genotype                                                                               | F = 6.070  | 3            | 0.0011                                                   | S9a    |
|                                                                                 |           |                                                      | Repeated measure    | Trial                                                                                  | F = 95.21  | 7            | < 0.0001                                                 |        |
|                                                                                 |           |                                                      |                     | Interaction                                                                            | F = 1.060  | 21           | 0.3895                                                   |        |
|                                                                                 |           |                                                      |                     | Subjects                                                                               | F = 9.069  | 60           | < 0.0001                                                 |        |
|                                                                                 |           |                                                      |                     | Residual                                                                               |            | 308          |                                                          |        |
|                                                                                 |           |                                                      | Bonferroni post hoc | WT vs. Cre                                                                             |            |              | > 0.05                                                   |        |
|                                                                                 |           |                                                      | Trial 1             | WT vs. Flox                                                                            |            |              | > 0.05                                                   |        |
|                                                                                 |           |                                                      |                     | WT vs. CKO                                                                             |            |              | > 0.05                                                   |        |
|                                                                                 |           |                                                      |                     | Cre vs. Flox                                                                           |            |              | > 0.05                                                   |        |
|                                                                                 |           |                                                      |                     | Cre vs. CKO                                                                            |            |              | > 0.05                                                   |        |

|                       |                             |                                                                                        |            |       |                                                           |
|-----------------------|-----------------------------|----------------------------------------------------------------------------------------|------------|-------|-----------------------------------------------------------|
|                       |                             | Flox vs. CKO                                                                           |            |       | > 0.05                                                    |
|                       | Bonferroni post hoc Trial 2 | WT vs. Cre<br>WT vs. Flox<br>WT vs. CKO<br>Cre vs. Flox<br>Cre vs. CKO<br>Flox vs. CKO |            |       | > 0.05<br>> 0.05<br>> 0.05<br>> 0.05<br>> 0.05<br>> 0.05  |
|                       | Bonferroni post hoc Trial 3 | WT vs. Cre<br>WT vs. Flox<br>WT vs. CKO<br>Cre vs. Flox<br>Cre vs. CKO<br>Flox vs. CKO |            |       | > 0.05<br>> 0.05<br>> 0.05<br>> 0.05<br>> 0.05<br>> 0.05  |
|                       | Bonferroni post hoc Trial 4 | WT vs. Cre<br>WT vs. Flox<br>WT vs. CKO<br>Cre vs. Flox<br>Cre vs. CKO<br>Flox vs. CKO |            |       | > 0.05<br>> 0.05<br>> 0.05<br>> 0.05<br>> 0.05<br>> 0.05  |
|                       | Bonferroni post hoc Trial 5 | WT vs. Cre<br>WT vs. Flox<br>WT vs. CKO<br>Cre vs. Flox<br>Cre vs. CKO<br>Flox vs. CKO |            |       | > 0.05<br>> 0.05<br>> 0.05<br>> 0.05<br>> 0.05<br>> 0.05  |
|                       | Bonferroni post hoc Trial 6 | WT vs. Cre<br>WT vs. Flox<br>WT vs. CKO<br>Cre vs. Flox<br>Cre vs. CKO<br>Flox vs. CKO |            |       | > 0.05<br>> 0.05<br>> 0.05<br>> 0.05<br>> 0.05<br>> 0.05  |
|                       | Bonferroni post hoc Trial 7 | WT vs. Cre<br>WT vs. Flox<br>WT vs. CKO<br>Cre vs. Flox<br>Cre vs. CKO<br>Flox vs. CKO |            |       | > 0.05<br>> 0.05<br>> 0.05<br>> 0.05<br>> 0.05<br>> 0.05  |
|                       | Bonferroni post hoc Trial 8 | WT vs. Cre<br>WT vs. Flox<br>WT vs. CKO<br>Cre vs. Flox<br>Cre vs. CKO<br>Flox vs. CKO |            |       | > 0.05<br>> 0.05<br>> 0.05<br>> 0.05<br>> 0.05<br>> 0.05  |
| latency to fall (sec) | One-way ANOVA Trial 1       | Genotype                                                                               | F = 0.4410 | 3, 60 | 0.7245                                                    |
|                       | Tukey's post hoc            | no post tests p > 0.05                                                                 |            |       |                                                           |
| latency to fall (sec) | One-way ANOVA Trial 2       | Genotype                                                                               | F = 3.290  | 3, 60 | 0.0266                                                    |
|                       | Tukey's post hoc            | WT vs. Cre<br>WT vs. Flox<br>WT vs. CKO<br>Cre vs. Flox<br>Cre vs. CKO<br>Flox vs. CKO |            |       | > 0.05<br>> 0.05<br>< 0.05<br>> 0.05<br>> 0.05<br>> 0.05  |
| latency to fall (sec) | One-way ANOVA Trial 3       | Genotype                                                                               | F = 7.426  | 3, 60 | 0.0003                                                    |
|                       | Tukey's post hoc            | WT vs. Cre<br>WT vs. Flox<br>WT vs. CKO<br>Cre vs. Flox<br>Cre vs. CKO<br>Flox vs. CKO |            |       | > 0.05<br>< 0.05<br>< 0.001<br>> 0.05<br>< 0.05<br>> 0.05 |
| latency to fall (sec) | One-way ANOVA Trial 4       | Genotype                                                                               | F = 3.534  | 3, 60 | 0.0199                                                    |
|                       | Tukey's post hoc            | WT vs. Cre<br>WT vs. Flox<br>WT vs. CKO<br>Cre vs. Flox<br>Cre vs. CKO<br>Flox vs. CKO |            |       | > 0.05<br>> 0.05<br>< 0.05<br>> 0.05<br>> 0.05<br>> 0.05  |
| latency to fall (sec) | One-way ANOVA Trial 5       | Genotype                                                                               | F = 3.202  | 3, 60 | 0.0295                                                    |
|                       | Tukey's post hoc            | WT vs. Cre<br>WT vs. Flox<br>WT vs. CKO<br>Cre vs. Flox<br>Cre vs. CKO<br>Flox vs. CKO |            |       | > 0.05<br>> 0.05<br>< 0.05<br>> 0.05<br>> 0.05<br>> 0.05  |
| latency to fall (sec) | One-way ANOVA Trial 6       | Genotype                                                                               | F = 2.917  | 3, 60 | 0.0414                                                    |
|                       | Tukey's post hoc            | WT vs. Cre<br>WT vs. Flox<br>WT vs. CKO<br>Cre vs. Flox<br>Cre vs. CKO<br>Flox vs. CKO |            |       | > 0.05<br>> 0.05<br>< 0.05<br>> 0.05<br>> 0.05<br>> 0.05  |
| latency to fall (sec) | One-way ANOVA Trial 7       | Genotype                                                                               | F = 3.137  | 3, 60 | 0.0319                                                    |
|                       | Tukey's post hoc            | WT vs. Cre<br>WT vs. Flox<br>WT vs. CKO<br>Cre vs. Flox                                |            |       | > 0.05<br>> 0.05<br>< 0.05<br>> 0.05                      |

|    |                       |                                   |                                                                                        |                                                  |                           |                                                             |    |
|----|-----------------------|-----------------------------------|----------------------------------------------------------------------------------------|--------------------------------------------------|---------------------------|-------------------------------------------------------------|----|
|    |                       |                                   | Cre vs. CKO<br>Flox vs. CKO                                                            |                                                  |                           | > 0.05<br>> 0.05                                            |    |
|    | latency to fall (sec) | One-way ANOVA<br>Trial 8          | Genotype                                                                               | F = 7.585                                        | 3, 60                     | 0.0002                                                      |    |
|    |                       | Tukey's post hoc                  | WT vs. Cre<br>WT vs. Flox<br>WT vs. CKO<br>Cre vs. Flox<br>Cre vs. CKO<br>Flox vs. CKO |                                                  |                           | > 0.05<br>> 0.05<br>< 0.001<br>> 0.05<br>< 0.001<br>< 0.01  |    |
| 19 | latency to fall (sec) | Two-way ANOVA<br>Repeated measure | Genotype<br>Trial<br>Interaction<br>Subjects<br>Residual                               | F = 13.40<br>F = 96.94<br>F = 1.454<br>F = 14.26 | 3<br>7<br>21<br>60<br>420 | < 0.0001<br>< 0.0001<br>0.0895<br>< 0.0001                  | 4g |
|    |                       | Bonferroni post hoc<br>Trial 1    | WT vs. Cre<br>WT vs. Flox<br>WT vs. CKO<br>Cre vs. Flox<br>Cre vs. CKO<br>Flox vs. CKO |                                                  |                           | > 0.05<br>> 0.05<br>< 0.05<br>> 0.05<br>> 0.05<br>> 0.05    |    |
|    |                       | Bonferroni post hoc<br>Trial 2    | WT vs. Cre<br>WT vs. Flox<br>WT vs. CKO<br>Cre vs. Flox<br>Cre vs. CKO<br>Flox vs. CKO |                                                  |                           | > 0.05<br>> 0.05<br>< 0.001<br>> 0.05<br>< 0.001<br>> 0.05  |    |
|    |                       | Bonferroni post hoc<br>Trial 3    | WT vs. Cre<br>WT vs. Flox<br>WT vs. CKO<br>Cre vs. Flox<br>Cre vs. CKO<br>Flox vs. CKO |                                                  |                           | > 0.05<br>< 0.05<br>< 0.001<br>> 0.05<br>< 0.001<br>> 0.05  |    |
|    |                       | Bonferroni post hoc<br>Trial 4    | WT vs. Cre<br>WT vs. Flox<br>WT vs. CKO<br>Cre vs. Flox<br>Cre vs. CKO<br>Flox vs. CKO |                                                  |                           | > 0.05<br>> 0.05<br>< 0.001<br>> 0.05<br>< 0.001<br>< 0.01  |    |
|    |                       | Bonferroni post hoc<br>Trial 5    | WT vs. Cre<br>WT vs. Flox<br>WT vs. CKO<br>Cre vs. Flox<br>Cre vs. CKO<br>Flox vs. CKO |                                                  |                           | > 0.05<br>> 0.05<br>< 0.001<br>> 0.05<br>< 0.001<br>< 0.01  |    |
|    |                       | Bonferroni post hoc<br>Trial 6    | WT vs. Cre<br>WT vs. Flox<br>WT vs. CKO<br>Cre vs. Flox<br>Cre vs. CKO<br>Flox vs. CKO |                                                  |                           | > 0.05<br>> 0.05<br>< 0.001<br>> 0.05<br>< 0.001<br>< 0.01  |    |
|    |                       | Bonferroni post hoc<br>Trial 7    | WT vs. Cre<br>WT vs. Flox<br>WT vs. CKO<br>Cre vs. Flox<br>Cre vs. CKO<br>Flox vs. CKO |                                                  |                           | > 0.05<br>> 0.05<br>< 0.001<br>> 0.05<br>< 0.001<br>< 0.01  |    |
|    |                       | Bonferroni post hoc<br>Trial 8    | WT vs. Cre<br>WT vs. Flox<br>WT vs. CKO<br>Cre vs. Flox<br>Cre vs. CKO<br>Flox vs. CKO |                                                  |                           | > 0.05<br>> 0.05<br>< 0.001<br>> 0.05<br>< 0.001<br>< 0.001 |    |
|    | latency to fall (sec) | One-way ANOVA<br>Trial 1          | Genotype                                                                               | F = 3.812                                        | 3, 60                     | 0.0144                                                      |    |
|    |                       | Tukey's post hoc                  | WT vs. Cre<br>WT vs. Flox<br>WT vs. CKO<br>Cre vs. Flox<br>Cre vs. CKO<br>Flox vs. CKO |                                                  |                           | > 0.05<br>> 0.05<br>< 0.01<br>> 0.05<br>> 0.05<br>> 0.05    |    |
|    | latency to fall (sec) | One-way ANOVA<br>Trial 2          | Genotype                                                                               | F = 5.815                                        | 3, 60                     | 0.0015                                                      |    |
|    |                       | Tukey's post hoc                  | WT vs. Cre<br>WT vs. Flox<br>WT vs. CKO<br>Cre vs. Flox<br>Cre vs. CKO<br>Flox vs. CKO |                                                  |                           | > 0.05<br>> 0.05<br>< 0.001<br>> 0.05<br>< 0.01<br>> 0.05   |    |
|    | latency to fall (sec) | One-way ANOVA<br>Trial 3          | Genotype                                                                               | F = 9.019                                        | 3, 60                     | < 0.0001                                                    |    |
|    |                       | Tukey's post hoc                  | WT vs. Cre<br>WT vs. Flox<br>WT vs. CKO<br>Cre vs. Flox<br>Cre vs. CKO<br>Flox vs. CKO |                                                  |                           | > 0.05<br>> 0.05<br>< 0.001<br>> 0.05<br>< 0.01<br>> 0.05   |    |
|    | latency to fall (sec) | One-way ANOVA<br>Trial 4          | Genotype                                                                               | F = 10.21                                        | 3, 60                     | < 0.0001                                                    |    |
|    |                       | Tukey's post hoc                  | WT vs. Cre<br>WT vs. Flox<br>WT vs. CKO                                                |                                                  |                           | > 0.05<br>> 0.05<br>< 0.001                                 |    |

|                                                      |    |                        |                                                  |                                                                                        |                                                   |                          |                                                             |     |
|------------------------------------------------------|----|------------------------|--------------------------------------------------|----------------------------------------------------------------------------------------|---------------------------------------------------|--------------------------|-------------------------------------------------------------|-----|
|                                                      |    |                        |                                                  | Cre vs. Flox<br>Cre vs. CKO<br>Flox vs. CKO                                            |                                                   |                          | > 0.05<br>< 0.01<br>< 0.01                                  |     |
|                                                      |    | latency to fall (sec)  | One-way ANOVA<br>Trial 5                         | Genotype                                                                               | F = 13.77                                         | 3, 60                    | < 0.0001                                                    |     |
|                                                      |    |                        | Tukey's post hoc                                 | WT vs. Cre<br>WT vs. Flox<br>WT vs. CKO<br>Cre vs. Flox<br>Cre vs. CKO<br>Flox vs. CKO |                                                   |                          | > 0.05<br>> 0.05<br>< 0.001<br>> 0.05<br>< 0.001<br>< 0.01  |     |
|                                                      |    | latency to fall (sec)  | One-way ANOVA<br>Trial 6                         | Genotype                                                                               | F = 11.29                                         | 3, 60                    | < 0.0001                                                    |     |
|                                                      |    |                        | Tukey's post hoc                                 | WT vs. Cre<br>WT vs. Flox<br>WT vs. CKO<br>Cre vs. Flox<br>Cre vs. CKO<br>Flox vs. CKO |                                                   |                          | > 0.05<br>> 0.05<br>< 0.001<br>> 0.05<br>< 0.001<br>< 0.01  |     |
|                                                      |    | latency to fall (sec)  | One-way ANOVA<br>Trial 7                         | Genotype                                                                               | F = 10.41                                         | 3, 60                    | < 0.0001                                                    |     |
|                                                      |    |                        | Tukey's post hoc                                 | WT vs. Cre<br>WT vs. Flox<br>WT vs. CKO<br>Cre vs. Flox<br>Cre vs. CKO<br>Flox vs. CKO |                                                   |                          | > 0.05<br>> 0.05<br>< 0.001<br>> 0.05<br>< 0.001<br>< 0.01  |     |
|                                                      |    | latency to fall (sec)  | One-way ANOVA<br>Trial 8                         | Genotype                                                                               | F = 11.78                                         | 3, 60                    | < 0.0001                                                    |     |
|                                                      |    |                        | Tukey's post hoc                                 | WT vs. Cre<br>WT vs. Flox<br>WT vs. CKO<br>Cre vs. Flox<br>Cre vs. CKO<br>Flox vs. CKO |                                                   |                          | > 0.05<br>> 0.05<br>< 0.001<br>> 0.05<br>< 0.001<br>< 0.01  |     |
| <i>Dlx5/6-Mecp2<sup>fl/y</sup></i><br>Nest building  | 18 | nesting score          | Two-way ANOVA<br>Repeated measure                | Genotype<br>Time<br>Interaction<br>Subjects<br>Residual                                | F = 20.16<br>F = 27.83<br>F = 5.723<br>F = 3.391  | 3<br>2<br>6<br>60<br>120 | < 0.0001<br>< 0.0001<br>< 0.0001<br>< 0.0001                | 4i  |
|                                                      |    |                        | Bonferroni post hoc<br>24 hours                  | WT vs. Cre<br>WT vs. Flox<br>WT vs. CKO<br>Cre vs. Flox<br>Cre vs. CKO<br>Flox vs. CKO |                                                   |                          | > 0.05<br>> 0.05<br>< 0.001<br>> 0.05<br>< 0.001<br>< 0.001 |     |
|                                                      |    |                        | Bonferroni post hoc<br>48 hours                  | WT vs. Cre<br>WT vs. Flox<br>WT vs. CKO<br>Cre vs. Flox<br>Cre vs. CKO<br>Flox vs. CKO |                                                   |                          | > 0.05<br>> 0.05<br>< 0.001<br>> 0.05<br>< 0.001<br>< 0.001 |     |
|                                                      |    |                        | Bonferroni post hoc<br>72 hours                  | WT vs. Cre<br>WT vs. Flox<br>WT vs. CKO<br>Cre vs. Flox<br>Cre vs. CKO<br>Flox vs. CKO |                                                   |                          | > 0.05<br>> 0.05<br>> 0.05<br>> 0.05<br>< 0.001<br>< 0.001  |     |
|                                                      |    | nesting score          | One-way ANOVA<br>24 hours                        | Genotype                                                                               | F = 12.15                                         | 3, 60                    | < 0.0001                                                    |     |
|                                                      |    |                        | Tukey's post hoc                                 | WT vs. Cre<br>WT vs. Flox<br>WT vs. CKO<br>Cre vs. Flox<br>Cre vs. CKO<br>Flox vs. CKO |                                                   |                          | > 0.05<br>> 0.05<br>< 0.001<br>> 0.05<br>< 0.001<br>< 0.001 |     |
|                                                      |    | nesting score          | One-way ANOVA<br>48 hours                        | Genotype                                                                               | F = 26.31                                         | 3, 60                    | < 0.0001                                                    |     |
|                                                      |    |                        | Tukey's post hoc                                 | WT vs. Cre<br>WT vs. Flox<br>WT vs. CKO<br>Cre vs. Flox<br>Cre vs. CKO<br>Flox vs. CKO |                                                   |                          | > 0.05<br>> 0.05<br>< 0.001<br>> 0.05<br>< 0.001<br>< 0.001 |     |
|                                                      |    | nesting score          | One-way ANOVA<br>72 hours                        | Genotype                                                                               | F = 6.818                                         | 3, 60                    | 0.0005                                                      |     |
|                                                      |    |                        | Tukey's post hoc                                 | WT vs. Cre<br>WT vs. Flox<br>WT vs. CKO<br>Cre vs. Flox<br>Cre vs. CKO<br>Flox vs. CKO |                                                   |                          | > 0.05<br>> 0.05<br>< 0.01<br>> 0.05<br>< 0.01<br>< 0.01    |     |
| <i>Dlx5/6-Mecp2<sup>fl/y</sup></i><br>Partition test | 6  | interaction time (sec) | Two-way ANOVA<br>Repeated measure                | Genotype<br>Trial<br>Interaction<br>Subjects<br>Residual                               | F = 0.6453<br>F = 214.8<br>F = 2.714<br>F = 4.634 | 3<br>2<br>6<br>60<br>120 | 0.5890<br>< 0.0001<br>0.0166<br>< 0.0001                    | S9f |
|                                                      |    |                        | Bonferroni post hoc<br>Familiar<br>1st encounter | WT vs. Cre<br>WT vs. Flox<br>WT vs. CKO                                                |                                                   |                          | > 0.05<br>> 0.05<br>> 0.05                                  |     |

|                                                                       |                        |                                                |                                                                                        |                                                  |                          |                                                            |        |     |
|-----------------------------------------------------------------------|------------------------|------------------------------------------------|----------------------------------------------------------------------------------------|--------------------------------------------------|--------------------------|------------------------------------------------------------|--------|-----|
|                                                                       |                        |                                                | Cre vs. Flox<br>Cre vs. CKO<br>Flox vs. CKO                                            |                                                  |                          | > 0.05<br>> 0.05<br>> 0.05                                 |        |     |
|                                                                       |                        | Bonferroni post hoc Novel                      | WT vs. Cre<br>WT vs. Flox<br>WT vs. CKO<br>Cre vs. Flox<br>Cre vs. CKO<br>Flox vs. CKO |                                                  |                          | > 0.05<br>> 0.05<br>> 0.05<br>> 0.05<br>> 0.05<br>> 0.05   |        |     |
|                                                                       |                        | Bonferroni post hoc Familiar 2nd encounter     | WT vs. Cre<br>WT vs. Flox<br>WT vs. CKO<br>Cre vs. Flox<br>Cre vs. CKO<br>Flox vs. CKO |                                                  |                          | > 0.05<br>> 0.05<br>> 0.05<br>> 0.05<br>> 0.05<br>> 0.05   |        |     |
|                                                                       | interaction time (sec) | One-way ANOVA 1st Familiar<br>Tukey's post hoc | Genotype                                                                               | F = 2.997                                        | 3, 60                    | 0.0376                                                     |        |     |
|                                                                       |                        |                                                | WT vs. Cre<br>WT vs. Flox<br>WT vs. CKO<br>Cre vs. Flox<br>Cre vs. CKO<br>Flox vs. CKO |                                                  |                          | > 0.05<br>> 0.05<br>> 0.05<br>> 0.05<br>> 0.05<br>< 0.05   |        |     |
|                                                                       | interaction time (sec) | One-way ANOVA Novel<br>Tukey's post hoc        | Genotype                                                                               | F = 0.8340                                       | 3, 60                    | 0.4807                                                     |        |     |
|                                                                       |                        |                                                | no post tests p > 0.05                                                                 |                                                  |                          |                                                            |        |     |
|                                                                       | interaction time (sec) | One-way ANOVA 2nd Familiar<br>Tukey's post hoc | Genotype                                                                               | F = 0.1745                                       | 3, 60                    | 0.9133                                                     |        |     |
|                                                                       |                        |                                                | no post tests p > 0.05                                                                 |                                                  |                          |                                                            |        |     |
| 18                                                                    | interaction time (sec) | Two-way ANOVA Repeated measure                 | Genotype<br>Trial<br>Interaction<br>Subjects<br>Residual                               | F = 11.62<br>F = 232.5<br>F = 3.787<br>F = 3.787 | 3<br>2<br>6<br>60<br>120 | < 0.0001<br>< 0.0001<br>0.0017<br>< 0.0001                 | 4j     |     |
|                                                                       |                        | Bonferroni post hoc Familiar 1st encounter     | WT vs. Cre<br>WT vs. Flox<br>WT vs. CKO<br>Cre vs. Flox<br>Cre vs. CKO<br>Flox vs. CKO |                                                  |                          | > 0.05<br>> 0.05<br>> 0.05<br>> 0.05<br>> 0.05<br>> 0.05   |        |     |
|                                                                       |                        | Bonferroni post hoc Novel                      | WT vs. Cre<br>WT vs. Flox<br>WT vs. CKO<br>Cre vs. Flox<br>Cre vs. CKO<br>Flox vs. CKO |                                                  |                          | > 0.05<br>> 0.05<br>< 0.001<br>> 0.05<br>< 0.001<br>< 0.05 |        |     |
|                                                                       |                        | Bonferroni post hoc Familiar 2nd encounter     | WT vs. Cre<br>WT vs. Flox<br>WT vs. CKO<br>Cre vs. Flox<br>Cre vs. CKO<br>Flox vs. CKO |                                                  |                          | > 0.05<br>> 0.05<br>< 0.05<br>> 0.05<br>< 0.05<br>> 0.05   |        |     |
|                                                                       | interaction time (sec) | One-way ANOVA 1st Familiar<br>Tukey's post hoc | Genotype                                                                               | F = 5.20                                         | 3, 60                    | 0.0029                                                     |        |     |
|                                                                       |                        |                                                | WT vs. Cre<br>WT vs. Flox<br>WT vs. CKO<br>Cre vs. Flox<br>Cre vs. CKO<br>Flox vs. CKO |                                                  |                          | > 0.05<br>> 0.05<br>< 0.05<br>> 0.05<br>< 0.01<br>> 0.05   |        |     |
|                                                                       | interaction time (sec) | One-way ANOVA Novel<br>Tukey's post hoc        | Genotype                                                                               | F = 15.33                                        | 3, 60                    | < 0.0001                                                   |        |     |
|                                                                       |                        |                                                | WT vs. Cre<br>WT vs. Flox<br>WT vs. CKO<br>Cre vs. Flox<br>Cre vs. CKO<br>Flox vs. CKO |                                                  |                          | > 0.05<br>< 0.05<br>< 0.001<br>> 0.05<br>< 0.001<br>< 0.05 |        |     |
|                                                                       | interaction time (sec) | One-way ANOVA 2nd Familiar<br>Tukey's post hoc | Genotype                                                                               | F = 5.536                                        | 3, 60                    | 0.002                                                      |        |     |
|                                                                       |                        |                                                | WT vs. Cre<br>WT vs. Flox<br>WT vs. CKO<br>Cre vs. Flox<br>Cre vs. CKO<br>Flox vs. CKO |                                                  |                          | > 0.05<br>> 0.05<br>< 0.01<br>> 0.05<br>< 0.05<br>> 0.05   |        |     |
| <i>Dlx5/6-Mecp2<sup>-fl/y</sup></i><br>3-Chamber<br>Habituation phase | 30                     | total time in left chamber (sec)               | One-way ANOVA<br>Tukey's post hoc                                                      | Genotype                                         | F = 0.2489               | 3, 28                                                      | 0.8614 | S9g |
|                                                                       |                        |                                                | no post tests p > 0.05                                                                 |                                                  |                          |                                                            |        |     |
|                                                                       |                        | total time in center chamber (sec)             | One-way ANOVA<br>Tukey's post hoc                                                      | Genotype                                         | F = 1.440                | 3, 28                                                      | 0.2521 | S9q |
|                                                                       |                        |                                                | no post tests p > 0.05                                                                 |                                                  |                          |                                                            |        |     |
|                                                                       |                        | total time in right chamber (sec)              | One-way ANOVA<br>Tukey's post hoc                                                      | Genotype                                         | F = 0.5298               | 3, 28                                                      | 0.6655 | S9q |
|                                                                       |                        |                                                | no post tests p > 0.05                                                                 |                                                  |                          |                                                            |        |     |
|                                                                       |                        | interaction time inanimate left cage (sec)     | One-way ANOVA<br>Tukey's post hoc                                                      | Genotype                                         | F = 1.148                | 3, 28                                                      | 0.3468 | S9h |
|                                                                       |                        |                                                | no post tests p > 0.05                                                                 |                                                  |                          |                                                            |        |     |
|                                                                       |                        | interaction time inanimate right cage (sec)    | One-way ANOVA<br>Tukey's post hoc                                                      | Genotype                                         | F = 1.384                | 3, 28                                                      | 0.2682 | S9h |
|                                                                       |                        |                                                | no post tests p > 0.05                                                                 |                                                  |                          |                                                            |        |     |

|                                                                |    |                                                       |                          |                                |                |            |          |          |     |
|----------------------------------------------------------------|----|-------------------------------------------------------|--------------------------|--------------------------------|----------------|------------|----------|----------|-----|
| <i>Dlx5/6-Mecp2<sup>+/y</sup></i><br>3-Chamber<br>Social phase | 30 | total time in chamber with inanimate empty cage (sec) | One-way ANOVA            | Genotype                       | F = 2.161      | 3, 28      | 0.1150   | S9i      |     |
|                                                                |    |                                                       | Tukey's post hoc         | no post tests $p > 0.05$       |                |            |          |          |     |
|                                                                |    | total time in center chamber (sec)                    | One-way ANOVA            | Genotype                       | F = 0.7285     | 3, 28      | 0.5436   | S9i      |     |
|                                                                |    |                                                       | Tukey's post hoc         | no post tests $p > 0.05$       |                |            |          |          |     |
|                                                                |    | total time in chamber with stranger mouse (sec)       | One-way ANOVA            | Genotype                       | F = 1.841      | 3, 28      | 0.1626   | S9i      |     |
|                                                                |    | Tukey's post hoc                                      | no post tests $p > 0.05$ |                                |                |            |          |          |     |
|                                                                |    | interaction time with inanimate empty cage (sec)      | One-way ANOVA            | Genotype                       | F = 0.4299     | 3, 28      | 0.7332   | 4k       |     |
|                                                                |    |                                                       | Tukey's post hoc         | no post tests $p > 0.05$       |                |            |          |          |     |
|                                                                |    | interaction time with stranger mouse(sec)             | One-way ANOVA            | Genotype                       | F = 9.229      | 3, 28      | 0.0002   | 4k       |     |
|                                                                |    |                                                       | Tukey's post hoc         | WT vs. Cre                     |                |            | > 0.05   |          |     |
|                                                                |    |                                                       |                          | WT vs. Flox                    |                |            | > 0.05   |          |     |
|                                                                |    |                                                       |                          | WT vs. CKO                     |                |            | < 0.05   |          |     |
|                                                                |    |                                                       |                          | Cre vs. Flox                   |                |            | > 0.05   |          |     |
|                                                                |    |                                                       |                          | Cre vs. CKO                    |                |            | < 0.001  |          |     |
|                                                                |    |                                                       |                          | Flox vs. CKO                   |                |            | < 0.01   |          |     |
| <i>Dlx5/6-Mecp2<sup>+/y</sup></i><br>Resident-intruder         | 32 | total aggressive behavior time (sec)                  | One-way ANOVA            | Genotype                       | F = 0.9589     | 3, 28      | 0.4258   | 4l       |     |
|                                                                |    |                                                       | Tukey's post hoc         | no post tests $p > 0.05$       |                |            |          |          |     |
| <i>Dlx5/6-Mecp2<sup>+/y</sup></i><br>Prepulse inhibition (PPI) | 7  | maximum response to 120 dB (A.U.)                     | One-way ANOVA            | Genotype                       | F = 26.12      | 3, 60      | < 0.0001 | 4m       |     |
|                                                                |    |                                                       | Tukey's post hoc         | WT vs. Cre                     |                |            | > 0.05   |          |     |
|                                                                |    |                                                       |                          | WT vs. Flox                    |                |            | < 0.05   |          |     |
|                                                                |    |                                                       |                          | WT vs. CKO                     |                |            | < 0.001  |          |     |
|                                                                |    |                                                       |                          | Cre vs. Flox                   |                |            | < 0.01   |          |     |
|                                                                |    |                                                       |                          | Cre vs. CKO                    |                |            | < 0.001  |          |     |
|                                                                |    |                                                       |                          | Flox vs. CKO                   |                |            | < 0.001  |          |     |
|                                                                |    |                                                       | % prepulse inhibition    | Two-way ANOVA                  | Genotype       | F = 1.473  | 3        | 0.2235   | 4n  |
|                                                                |    |                                                       |                          |                                | Prepulse level | F = 40.15  | 2        | < 0.0001 |     |
|                                                                |    |                                                       |                          |                                | Interaction    | F = 0.3914 | 6        | 0.8839   |     |
|                                                                |    |                                                       |                          |                                | Residual       |            | 180      |          |     |
|                                                                |    |                                                       |                          | Bonferroni post hoc 74 (+4) dB | WT vs. Cre     |            |          | > 0.05   |     |
|                                                                |    |                                                       |                          |                                | WT vs. Flox    |            |          | > 0.05   |     |
|                                                                |    |                                                       |                          |                                | WT vs. CKO     |            |          | > 0.05   |     |
|                                                                |    |                                                       |                          |                                | Cre vs. Flox   |            |          | > 0.05   |     |
|                                                                |    |                                                       | Cre vs. CKO              |                                |                | > 0.05     |          |          |     |
|                                                                |    |                                                       | Flox vs. CKO             |                                |                | > 0.05     |          |          |     |
|                                                                |    | Bonferroni post hoc 78 (+8) dB                        | WT vs. Cre               |                                |                | > 0.05     |          |          |     |
|                                                                |    |                                                       | WT vs. Flox              |                                |                | > 0.05     |          |          |     |
|                                                                |    |                                                       | WT vs. CKO               |                                |                | > 0.05     |          |          |     |
|                                                                |    |                                                       | Cre vs. Flox             |                                |                | > 0.05     |          |          |     |
|                                                                |    |                                                       | Cre vs. CKO              |                                |                | > 0.05     |          |          |     |
|                                                                |    |                                                       | Flox vs. CKO             |                                |                | > 0.05     |          |          |     |
|                                                                |    | Bonferroni post hoc 82 (+12) dB                       | WT vs. Cre               |                                |                | > 0.05     |          |          |     |
|                                                                |    |                                                       | WT vs. Flox              |                                |                | > 0.05     |          |          |     |
|                                                                |    |                                                       | WT vs. CKO               |                                |                | > 0.05     |          |          |     |
|                                                                |    |                                                       | Cre vs. Flox             |                                |                | > 0.05     |          |          |     |
|                                                                |    |                                                       | Cre vs. CKO              |                                |                | > 0.05     |          |          |     |
|                                                                |    |                                                       | Flox vs. CKO             |                                |                | > 0.05     |          |          |     |
|                                                                |    | % prepulse inhibition 74 (+4) dB                      | One-way ANOVA            | Genotype                       | F = 0.1384     | 3, 60      | 0.9366   |          |     |
|                                                                |    |                                                       | Tukey's post hoc         | no post tests $p > 0.05$       |                |            |          |          |     |
|                                                                |    | % prepulse inhibition 78 (+8) dB                      | One-way ANOVA            | Genotype                       | F = 0.3024     | 3, 60      | 0.8235   |          |     |
|                                                                |    |                                                       | Tukey's post hoc         | no post tests $p > 0.05$       |                |            |          |          |     |
|                                                                |    | % prepulse inhibition 82 (+12) dB                     | One-way ANOVA            | Genotype                       | F = 1.842      | 3, 60      | 0.1493   |          |     |
|                                                                |    |                                                       | Tukey's post hoc         | no post tests $p > 0.05$       |                |            |          |          |     |
|                                                                | 24 | maximum response to 120 dB (A.U.)                     | One-way ANOVA            | Genotype                       | F = 10.68      | 3, 60      | < 0.0001 | S9j      |     |
|                                                                |    |                                                       | Tukey's post hoc         | WT vs. Cre                     |                |            | > 0.05   |          |     |
|                                                                |    |                                                       |                          | WT vs. Flox                    |                |            | < 0.001  |          |     |
|                                                                |    |                                                       |                          | WT vs. CKO                     |                |            | < 0.001  |          |     |
|                                                                |    |                                                       |                          | Cre vs. Flox                   |                |            | < 0.01   |          |     |
|                                                                |    |                                                       |                          | Cre vs. CKO                    |                |            | < 0.05   |          |     |
|                                                                |    |                                                       |                          | Flox vs. CKO                   |                |            | > 0.05   |          |     |
|                                                                |    |                                                       | % prepulse inhibition    | Two-way ANOVA                  | Genotype       | F = 28.90  | 3        | < 0.0001 | S9k |
|                                                                |    |                                                       |                          |                                | Prepulse level | F = 185.1  | 2        | < 0.0001 |     |
|                                                                |    |                                                       |                          |                                | Interaction    | F = 1.837  | 6        | 0.0942   |     |
|                                                                |    |                                                       |                          |                                | Residual       |            | 180      |          |     |
|                                                                |    |                                                       |                          | Bonferroni post hoc 74 (+4) dB | WT vs. Cre     |            |          | < 0.01   |     |
|                                                                |    |                                                       |                          |                                | WT vs. Flox    |            |          | > 0.05   |     |
|                                                                |    |                                                       |                          |                                | WT vs. CKO     |            |          | < 0.001  |     |
|                                                                |    |                                                       |                          |                                | Cre vs. Flox   |            |          | > 0.05   |     |
|                                                                |    |                                                       | Cre vs. CKO              |                                |                | < 0.001    |          |          |     |
|                                                                |    |                                                       | Flox vs. CKO             |                                |                | < 0.001    |          |          |     |
|                                                                |    | Bonferroni post hoc 78 (+8) dB                        | WT vs. Cre               |                                |                | > 0.05     |          |          |     |
|                                                                |    |                                                       | WT vs. Flox              |                                |                | < 0.01     |          |          |     |
|                                                                |    |                                                       | WT vs. CKO               |                                |                | < 0.001    |          |          |     |
|                                                                |    |                                                       | Cre vs. Flox             |                                |                | > 0.05     |          |          |     |
|                                                                |    |                                                       | Cre vs. CKO              |                                |                | < 0.05     |          |          |     |
|                                                                |    |                                                       | Flox vs. CKO             |                                |                | > 0.05     |          |          |     |
|                                                                |    | Bonferroni post hoc 82 (+12) dB                       | WT vs. Cre               |                                |                | > 0.05     |          |          |     |
|                                                                |    |                                                       | WT vs. Flox              |                                |                | < 0.001    |          |          |     |
|                                                                |    |                                                       | WT vs. CKO               |                                |                | < 0.001    |          |          |     |
|                                                                |    |                                                       | Cre vs. Flox             |                                |                | > 0.05     |          |          |     |
|                                                                |    |                                                       | Cre vs. CKO              |                                |                | > 0.05     |          |          |     |
|                                                                |    |                                                       | Flox vs. CKO             |                                |                | > 0.05     |          |          |     |

|                                                            |                                                            |                                   |                                                                                        |                                                                                        |                          |            |                                                                        |        |     |        |  |
|------------------------------------------------------------|------------------------------------------------------------|-----------------------------------|----------------------------------------------------------------------------------------|----------------------------------------------------------------------------------------|--------------------------|------------|------------------------------------------------------------------------|--------|-----|--------|--|
|                                                            |                                                            | % prepulse inhibition             | One-way ANOVA<br>74 (+4) dB<br>Tukey's post hoc                                        | Genotype                                                                               | F = 10.56                | 3, 60      | < 0.0001<br>> 0.05<br>> 0.05<br>< 0.001<br>> 0.05<br>< 0.05<br>< 0.01  |        |     |        |  |
|                                                            |                                                            | % prepulse inhibition             | One-way ANOVA<br>78 (+8) dB<br>Tukey's post hoc                                        | Genotype                                                                               | F = 8.131                | 3, 60      | 0.0001<br>> 0.05<br>< 0.05<br>< 0.001<br>> 0.05<br>< 0.05<br>> 0.05    |        |     |        |  |
|                                                            |                                                            | % prepulse inhibition             | One-way ANOVA<br>82 (+12) dB<br>Tukey's post hoc                                       | Genotype                                                                               | F = 19.02                | 3, 60      | < 0.0001<br>< 0.01<br>< 0.001<br>< 0.001<br>< 0.05<br>< 0.01<br>> 0.05 |        |     |        |  |
| <i>Dlx5/6-Mecp2<sup>+/y</sup></i><br>Light-dark            | 5                                                          | time in light side (sec)          | One-way ANOVA                                                                          | Genotype                                                                               | F = 5.242                | 3, 60      | 0.0028                                                                 | S10a   |     |        |  |
|                                                            |                                                            |                                   | Tukey's post hoc                                                                       | WT vs. Cre<br>WT vs. Flox<br>WT vs. CKO<br>Cre vs. Flox<br>Cre vs. CKO<br>Flox vs. CKO |                          |            | > 0.05<br>> 0.05<br>< 0.05<br>> 0.05<br>< 0.01<br>> 0.05               |        |     |        |  |
|                                                            |                                                            | number of entries into light side | One-way ANOVA                                                                          | Genotype                                                                               | F = 3.930                | 3, 60      | 0.0126                                                                 | S10b   |     |        |  |
|                                                            |                                                            |                                   | Tukey's post hoc                                                                       | WT vs. Cre<br>WT vs. Flox<br>WT vs. CKO<br>Cre vs. Flox<br>Cre vs. CKO<br>Flox vs. CKO |                          |            | > 0.05<br>> 0.05<br>> 0.05<br>< 0.05<br>< 0.05<br>> 0.05               |        |     |        |  |
|                                                            | 14                                                         | time in light side (sec)          | One-way ANOVA                                                                          | Genotype                                                                               | F = 0.9938               | 3, 60      | 0.4020                                                                 | S10c   |     |        |  |
|                                                            |                                                            | number of entries into light side | One-way ANOVA                                                                          | Genotype                                                                               | F = 2.161                | 3, 60      | 0.1020                                                                 | S10d   |     |        |  |
|                                                            |                                                            |                                   |                                                                                        | no post tests $p > 0.05$                                                               |                          |            |                                                                        |        |     |        |  |
| <i>Dlx5/6-Mecp2<sup>+/y</sup></i><br>Open field assay      | 5                                                          | center distance (cm)              | One-way ANOVA                                                                          | Genotype                                                                               | F = 1.614                | 3, 60      | 0.1956                                                                 | S10e   |     |        |  |
|                                                            |                                                            | ratio center to total distance    | One-way ANOVA                                                                          | Genotype                                                                               | F = 1.862                | 3, 60      | 0.1457                                                                 | S10f   |     |        |  |
|                                                            | 16                                                         | center distance (cm)              | One-way ANOVA                                                                          | Genotype                                                                               | F = 2.421                | 3, 60      | 0.0747                                                                 | S10g   |     |        |  |
|                                                            |                                                            | ratio center to total distance    | One-way ANOVA                                                                          | Genotype                                                                               | F = 2.490                | 3, 60      | 0.0689                                                                 | S10h   |     |        |  |
|                                                            |                                                            |                                   |                                                                                        |                                                                                        | no post tests $p > 0.05$ |            |                                                                        |        |     |        |  |
|                                                            | <i>Dlx5/6-Mecp2<sup>+/y</sup></i><br>Olfactory recognition | 11                                | sniffing time (s)                                                                      | Two-way ANOVA                                                                          | Genotype                 | F = 1.434  | 3                                                                      | 0.2418 | S7c |        |  |
| Repeated measure                                           |                                                            |                                   |                                                                                        | Trial                                                                                  | F = 93.80                | 2          | < 0.0001                                                               |        |     |        |  |
|                                                            |                                                            |                                   |                                                                                        | Interaction                                                                            | F = 0.9710               | 6          | 0.4479                                                                 |        |     |        |  |
|                                                            |                                                            |                                   |                                                                                        | Subjects                                                                               | F = 1.782                | 60         | 0.0038                                                                 |        |     |        |  |
|                                                            |                                                            |                                   | Residual                                                                               |                                                                                        |                          | 120        |                                                                        |        |     |        |  |
|                                                            |                                                            | Bonferroni post hoc               | WT vs. Cre<br>WT vs. Flox<br>WT vs. CKO<br>Cre vs. Flox<br>Cre vs. CKO<br>Flox vs. CKO |                                                                                        |                          |            | > 0.05<br>> 0.05<br>> 0.05<br>> 0.05<br>> 0.05<br>> 0.05               |        |     |        |  |
|                                                            |                                                            | Bonferroni post hoc               | WT vs. Cre<br>WT vs. Flox<br>WT vs. CKO<br>Cre vs. Flox<br>Cre vs. CKO<br>Flox vs. CKO |                                                                                        |                          |            | > 0.05<br>> 0.05<br>> 0.05<br>> 0.05<br>> 0.05<br>> 0.05               |        |     |        |  |
|                                                            |                                                            | Bonferroni post hoc               | WT vs. Cre<br>WT vs. Flox<br>WT vs. CKO<br>Cre vs. Flox<br>Cre vs. CKO<br>Flox vs. CKO |                                                                                        |                          |            | > 0.05<br>> 0.05<br>> 0.05<br>> 0.05<br>> 0.05<br>> 0.05               |        |     |        |  |
|                                                            |                                                            | Bonferroni post hoc               | WT vs. Cre<br>WT vs. Flox<br>WT vs. CKO<br>Cre vs. Flox<br>Cre vs. CKO<br>Flox vs. CKO |                                                                                        |                          |            | > 0.05<br>> 0.05<br>> 0.05<br>> 0.05<br>> 0.05<br>> 0.05               |        |     |        |  |
|                                                            |                                                            | sniffing time (s)                 | One-way ANOVA                                                                          | Genotype                                                                               | F = 0.1940               | 3, 60      | 0.9001                                                                 |        |     |        |  |
|                                                            |                                                            |                                   |                                                                                        | no post tests $p > 0.05$                                                               |                          |            |                                                                        |        |     |        |  |
|                                                            | sniffing time (s)                                          | One-way ANOVA                     | Genotype                                                                               | F = 1.176                                                                              | 3, 60                    | 0.3263     |                                                                        |        |     |        |  |
|                                                            |                                                            |                                   |                                                                                        | no post tests $p > 0.05$                                                               |                          |            |                                                                        |        |     |        |  |
|                                                            | sniffing time (s)                                          | One-way ANOVA                     | Genotype                                                                               | F = 1.859                                                                              | 3, 60                    | 0.1462     |                                                                        |        |     |        |  |
|                                                            |                                                            |                                   |                                                                                        | no post tests $p > 0.05$                                                               |                          |            |                                                                        |        |     |        |  |
| <i>Dlx5/6-Mecp2<sup>+/y</sup></i><br>Olfactory habituation | 11                                                         | sniffing time (s)                 | Two-way ANOVA                                                                          | Genotype                                                                               | F = 1.179                | 3          | 0.3252                                                                 | S7d    |     |        |  |
|                                                            |                                                            |                                   | Repeated measure                                                                       | Trial                                                                                  | F = 90.92                | 1          | < 0.0001                                                               |        |     |        |  |
|                                                            |                                                            |                                   |                                                                                        | Interaction                                                                            |                          | F = 1.006  |                                                                        | 3      |     | 0.3965 |  |
|                                                            |                                                            |                                   |                                                                                        | Subjects                                                                               |                          | F = 1.122  |                                                                        | 60     |     | 0.3289 |  |
|                                                            |                                                            |                                   |                                                                                        | Residual                                                                               |                          |            |                                                                        | 60     |     |        |  |
|                                                            |                                                            |                                   |                                                                                        | Bonferroni post hoc                                                                    |                          | WT vs. Cre |                                                                        |        |     | > 0.05 |  |

|  |                   |                              |                                                                                        |             |       |                                                          |
|--|-------------------|------------------------------|----------------------------------------------------------------------------------------|-------------|-------|----------------------------------------------------------|
|  |                   | Day 1                        | WT vs. Flox<br>WT vs. CKO<br>Cre vs. Flox<br>Cre vs. CKO<br>Flox vs. CKO               |             |       | > 0.05<br>> 0.05<br>> 0.05<br>> 0.05<br>> 0.05           |
|  |                   | Bonferroni post hoc<br>Day 2 | WT vs. Cre<br>WT vs. Flox<br>WT vs. CKO<br>Cre vs. Flox<br>Cre vs. CKO<br>Flox vs. CKO |             |       | > 0.05<br>> 0.05<br>> 0.05<br>> 0.05<br>> 0.05<br>> 0.05 |
|  | sniffing time (s) | One-way ANOVA<br>Day 1       | Genotype                                                                               | F = 1.176   | 3, 60 | 0.3263                                                   |
|  |                   | Tukey's post hoc             | no post tests p > 0.05                                                                 |             |       |                                                          |
|  | sniffing time (s) | One-way ANOVA<br>Day 2       | Genotype                                                                               | F = 0.07456 | 3, 60 | 0.9734                                                   |
|  |                   | Tukey's post hoc             | no post tests p > 0.05                                                                 |             |       |                                                          |
